# Supplementary material for: Direct visualization of a native Wnt in vivo reveals that a long-range Wnt gradient forms by extracellular dispersal
Source: eLife journal article supplement (doi:10.7554/elife.38325), 2018-08-14
Supplement: supp [file elife-38325-supp-v1.zip]

Archive with 16 entries (16 files):
- elife_poa_e38325_Figure_3_figure_supplement_2.ai
- elife_poa_e38325_Figure_6_figure_supplement_1.ai
- elife_poa_e38325_Figure_5_figure_supplement_1.ai
- elife_poa_e38325_Figure_1_figure_supplement_3.ai
- elife_poa_e38325_Video_1.mov
- elife_poa_e38325_Figure_3_figure_supplement_1.ai
- elife_poa_e38325_Figure_1_source_data_2.xlsx
- elife_poa_e38325_Figure_1_source_data_1.xlsx
- elife_poa_e38325_Figure_2_figure_supplement_1.ai
- elife_poa_e38325_Figure_1_figure_supplement_1.ai
- elife_poa_e38325_Figure_6_source_data_2.xlsx
- elife_poa_e38325_Transparent_Reporting_File.pdf
- elife_poa_e38325_Figure_1_figure_supplement_2.ai
- elife_poa_e38325_Figure_3_figure_supplement_3.ai
- elife_poa_e38325_Video_2.mov
- elife_poa_e38325_Figure_6_source_data_1.xlsx
