# Supplementary material for: Direct visualization of a native Wnt in vivo reveals that a long-range Wnt gradient forms by extracellular dispersal
Source: eLife journal article supplement (doi:10.7554/elife.38325), 2018-08-14
Supplement: supp [file elife-38325-supp-v1.zip › elife_poa_e38325_Figure_1_source_data_1.xlsx]

## Sheet: Sheet1
	Figure 1 - source data 1. Axial positions of Q neuroblast descendants (% URX - PLM distance)
	Neuron	AQR (QR descendant)				AVM (QR descendant)				PVM (QL descendant)				PQR (QL descendant)
	Strain	wild-type (N2)	egl-20(n858)	EGL-20::mNG	EGL-20::YPET	wild-type (N2)	egl-20(n858)	EGL-20::mNG	EGL-20::YPET	wild-type (N2)	egl-20(n858)	EGL-20::mNG	EGL-20::YPET	wild-type (N2)	egl-20(n858)	EGL-20::mNG	EGL-20::YPET
		0.0673077	0.0962424	0.0515865	0.0479751	0.325001	0.41925	0.305555	0.305847	0.751924	0.429035	0.730157	0.722638	0.978847	0.0652504	0.972216	0.982008
		0.0646766	0.0604482	0.0968938	0.0711176	0.306799	0.325887	0.33915	0.306241	0.716418	0.461235	0.738376	0.731495	0.976783	0.318005	0.974806	0.985486
		0.0673469	0.0955285	0.0620579	0.0830245	0.320408	0.465674	0.280145	0.330258	0.736735	0.594031	0.707449	0.719558	0.971429	0.104474	0.978725	0.97048
		0.0690731	0.074734	0.0861124	0.0734312	0.302982	0.322867	0.312825	0.285714	0.712715	0.538117	0.717045	0.711615	0.978022	0.0792203	0.977153	0.987984
		0.0596394	0.0865017	0.061086	0.0740741	0.294036	0.358652	0.319005	0.316872	0.714286	0.6076	0.705882	0.710562	0.969487	0.206752	0.977376	0.986283
		0.0772834	0.112067	0.0523298	0.0928723	0.320843	0.36638	0.294197	0.345572	0.704918	0.43534	0.693067	0.749461	0.964871	0.0474122	0.964638	0.978402
		0.0743248	0.0738461	0.0901305	0.0822315	0.302365	0.327692	0.324031	0.314244	0.714527	0.38	0.718881	0.726873	0.961149	0.0815385	0.967806	0.980911
		0.0577717	0.0709891	0.0699505	0.0932751	0.30674	0.39043	0.345678	0.338394	0.723521	0.40895	0.742799	0.744034	0.975241	0.169754	0.973251	0.971801
		0.0894055	0.0961149	0.0843657	0.0499002	0.338884	0.357875	0.331278	0.309381	0.742205	0.525563	0.711933	0.710579	0.97505	0.0961149	0.975307	0.979042
		0.0962481	0.091118	0.0718737	0.0887949	0.316905	0.328539	0.308662	0.323467	0.715967	0.414865	0.725158	0.725159	0.964794	0.091118	0.976756	0.968288
		0.0806397	0.0769231	0.0659436	0.0671141	0.319649	0.355385	0.335883	0.299329	0.730205	0.409231	0.708585	0.708725	0.980939	0.0830769	0.984656	0.975839
		0.0713202	0.0711921	0.0842576	0.0772727	0.335357	0.372517	0.319288	0.325758	0.70258	0.403974	0.711758	0.721212	0.975721	0.0745033	0.966743	0.971212
		0.0905045	0.0772901	0.080713	0.08166	0.304154	0.326336	0.316143	0.334672	0.692878	0.537214	0.715251	0.710843	0.964392	0.0791985	0.973096	0.977242
		0.0890208	0.0806962	0.0723816	0.0898715	0.307122	0.318038	0.304754	0.313838	0.688427	0.405063	0.687618	0.71612	0.965875	0.0696202	0.969516	0.98003
		0.0847982	0.0708216	0.0654912	0.0554528	0.324562	0.338524	0.311498	0.316082	0.730994	0.413595	0.70607	0.722736	0.985382	0.0807325	0.971247	0.968576
				0.0793375	0.0764835			0.323969	0.325777			0.712401	0.702543			0.978513	0.975918
				0.0974683	0.0518048			0.299642	0.306302			0.720217	0.713967			0.974731	0.968464
				0.0816315	0.0898839			0.299845	0.322093			0.709578	0.715363			0.974888	0.971911
				0.0764136				0.299002				0.699331				0.97342
				0.0758278				0.309631				0.712477				0.971565
