# Supplementary material for: Direct visualization of a native Wnt in vivo reveals that a long-range Wnt gradient forms by extracellular dispersal
Source: eLife journal article supplement (doi:10.7554/elife.38325), 2018-08-14
Supplement: supp [file elife-38325-supp-v1.zip › elife_poa_e38325_Figure_1_source_data_2.xlsx]

## Sheet: Sheet1
	Figure 1 - source data 2. Fluorescence intensity values for profile plots
	Figure 1f			Figure 1h
	Distance (microns)	EGL-20::YPET fluorescence intensity (AU)		Distance (microns)	Raw EGL-20::mNG fluorescence intensity (AU)	Raw Pegl-20>2x mKate2::PH fluorescence intensity (AU)	Normalized EGL-20::mNG fluorescence intensity	Normalized Pegl-20>2x mKate2::PH fluorescence intensity
	0	21.937		0	126.659	139.974	1.72503	0.595289
	0.343844	23.092		0.172	126.603	140.181	1.70035	0.620087
	0.687688	22.987		0.344	127.131	140.082	1.93311	0.608227
	1.03153	22.547		0.516	126.683	140.608	1.73562	0.671242
	1.37538	22.162		0.688	126.219	140.125	1.53106	0.613379
	1.71922	22.986		0.86	127.146	141.254	1.93973	0.748633
	2.06306	22.738		1.032	126.991	140.325	1.8714	0.637339
	2.40691	22.774		1.203	127.18	140.35	1.95472	0.640334
	2.75075	22.331		1.375	126.918	140.891	1.83921	0.705146
	3.0946	23.237		1.547	127.108	140.671	1.92298	0.67879
	3.43844	23.732		1.719	127.048	140.863	1.89652	0.701791
	3.78228	23.754		1.891	127.288	141.163	2.00233	0.737732
	4.12613	23.699		2.063	126.941	140.927	1.84935	0.709459
	4.46997	23.125		2.235	127.531	141.36	2.10945	0.761332
	4.81382	22.823		2.407	128.255	142.61	2.42863	0.911083
	5.15766	23.1		2.579	128.721	142.012	2.63406	0.839442
	5.50151	24.945		2.751	128.379	142.549	2.48329	0.903775
	5.84535	23.62		2.923	128.373	141.004	2.48065	0.718683
	6.18919	23.661		3.095	129.042	141.542	2.77557	0.783136
	6.53304	23.738		3.267	129.199	141.649	2.84479	0.795955
	6.87688	24.107		3.438	129.322	142.405	2.89901	0.886524
	7.22073	24.449		3.61	128.311	141.542	2.45331	0.783136
	7.56457	24.816		3.782	129.269	143.451	2.87565	1.01184
	7.90841	23.579		3.954	129.155	143.038	2.82539	0.962357
	8.25226	26.363		4.126	128.795	144.026	2.66668	1.08072
	8.5961	24.483		4.298	129.748	145.17	3.08681	1.21777
	8.93995	23.726		4.47	130.174	145.352	3.27461	1.23958
	9.28379	24.723		4.642	130.378	144.762	3.36455	1.16889
	9.62763	24.643		4.814	130.728	143.974	3.51884	1.07449
	9.97148	24.645		4.986	131.071	143.001	3.67005	0.957925
	10.3153	25.588		5.158	131.01	142.324	3.64316	0.87682
	10.6592	24.698		5.33	130.884	144.742	3.58761	1.1665
	11.003	25.544		5.502	131.889	144.844	4.03067	1.17872
	11.3469	25.7		5.673	131.739	144.742	3.96454	1.1665
	11.6907	25.538		5.845	131.355	143.591	3.79525	1.02861
	12.0345	24.079		6.017	131.853	143.777	4.01479	1.05089
	12.3784	24.676		6.189	131.574	142.791	3.8918	0.932767
	12.7222	25.873		6.361	131.46	143.307	3.84154	0.994584
	13.0661	26.854		6.533	130.786	142.246	3.54441	0.867475
	13.4099	26.494		6.705	131.235	142.282	3.74235	0.871788
	13.7538	26.114		6.877	131.073	143.526	3.67093	1.02082
	14.0976	27.405		7.049	131.734	143.184	3.96233	0.979848
	14.4415	28.394		7.221	131.167	143.441	3.71237	1.01064
	14.7853	27.281		7.393	130.656	143.51	3.4871	1.0189
	15.1291	29.799		7.565	131.236	142.692	3.74279	0.920907
	15.473	29.749		7.736	131.483	142.949	3.85168	0.951695
	15.8168	29.838		7.908	131.312	142.159	3.7763	0.857053
	16.1607	29.782		8.08	131.969	142.263	4.06593	0.869512
	16.5045	29.089		8.252	131.518	142.964	3.86711	0.953492
	16.8484	28.305		8.424	132.003	143.643	4.08092	1.03484
	17.1922	28.738		8.596	131.401	143.468	3.81553	1.01387
	17.536	29.153		8.768	131.747	143.212	3.96807	0.983203
	17.8799	30.299		8.94	131.991	142.931	4.07563	0.949539
	18.2237	29.584		9.112	132.204	143.175	4.16953	0.97877
	18.5676	31.579		9.284	132.325	142.15	4.22287	0.855975
	18.9114	32.253		9.456	132.073	142.9	4.11178	0.945825
	19.2553	34.779		9.628	132.169	142.672	4.1541	0.91851
	19.5991	38.334		9.8	131.556	141.973	3.88386	0.83477
	19.943	39.678		9.971	131.677	141.843	3.93721	0.819196
	20.2868	41.589		10.143	131.473	143.506	3.84727	1.01842
	20.6306	42.01		10.315	131.953	143.036	4.05888	0.962118
	20.9745	42.163		10.487	133.08	142.813	4.55571	0.935402
	21.3183	38.494		10.659	132.763	142.156	4.41597	0.856693
	21.6622	40.331		10.831	132.523	143.235	4.31016	0.985958
	22.006	43.44		11.003	132.243	142.822	4.18673	0.936481
	22.3499	47.739		11.175	131.892	142.313	4.03199	0.875502
	22.6937	49.033		11.347	131.643	142.776	3.92222	0.93097
	23.0376	49.485		11.519	131.357	142.846	3.79613	0.939356
	23.3814	49.536		11.691	132.499	144.901	4.29958	1.18555
	23.7252	51.185		11.863	132.896	143.114	4.4746	0.971462
	24.0691	49.445		12.035	132.955	142.09	4.50061	0.848787
	24.4129	51.768		12.206	131.465	141.718	3.84375	0.804221
	24.7568	56.551		12.378	131.648	141.631	3.92442	0.793798
	25.1006	53.417		12.55	131.484	142.495	3.85212	0.897306
	25.4445	56.051		12.722	132.228	142.716	4.18011	0.923782
	25.7883	59.67		12.894	132.764	142.274	4.41641	0.87083
	26.1321	80.751		13.066	132.743	142.739	4.40715	0.926537
	26.476	87.119		13.238	133.131	143.519	4.5782	1.01998
	26.8198	74.092		13.41	133.088	143.473	4.55924	1.01447
	27.1637	73.219		13.582	134.425	143.613	5.14865	1.03124
	27.5075	65.506		13.754	133.762	142.612	4.85637	0.911322
	27.8514	62.534		13.926	133.583	143.531	4.77746	1.02142
	28.1952	65.822		14.098	133.983	142.268	4.9538	0.870111
	28.5391	68.295		14.27	134.345	142.897	5.11339	0.945466
	28.8829	72.633		14.441	134.021	142.36	4.97055	0.881133
	29.2267	78.378		14.613	134.782	143.139	5.30604	0.974457
	29.5706	81.467		14.785	134.818	143.605	5.32191	1.03028
	29.9144	79.832		14.957	134.48	143.323	5.1729	0.996501
	30.2583	80.864		15.129	134.539	142.863	5.19891	0.941392
	30.6021	80.75		15.301	135.439	141.937	5.59567	0.830457
	30.946	83.571		15.473	135.522	142.132	5.63226	0.853818
	31.2898	85.222		15.645	135.753	142.745	5.7341	0.927256
	31.6337	89.868		15.817	135.19	142.707	5.4859	0.922704
	31.9775	89.142		15.989	134.835	142.455	5.3294	0.892514
	32.3213	90.821		16.161	133.578	143.132	4.77526	0.973619
	32.6652	94.83		16.333	134.498	143.948	5.18084	1.07138
	33.009	101.579		16.505	134.204	142.634	5.05123	0.913958
	33.3529	97.757		16.676	135.193	143.81	5.48722	1.05484
	33.6967	106.859		16.848	135.109	143.005	5.45019	0.958404
	34.0406	94.187		17.02	134.726	143.585	5.28135	1.02789
	34.3844	89.157		17.192	134.409	142.892	5.1416	0.944867
	34.7283	97.827		17.364	135.5	143.846	5.62256	1.05916
	35.0721	99.396		17.536	135.73	143.263	5.72396	0.989313
	35.4159	95		17.708	135.312	143.671	5.53969	1.03819
	35.7598	92.122		17.88	135.75	142.84	5.73278	0.938637
	36.1036	99.954		18.052	134.394	142.905	5.13499	0.946424
	36.4475	94.652		18.224	134.39	143.867	5.13322	1.06167
	36.7913	99.117		18.396	135.117	143.35	5.45372	0.999735
	37.1352	96.34		18.568	134.297	142.623	5.09223	0.91264
	37.479	102.854		18.74	133.529	142.978	4.75365	0.955169
	37.8228	106.336		18.911	133.011	143.584	4.5253	1.02777
	38.1667	104.562		19.083	133.874	143.709	4.90575	1.04274
	38.5105	107.309		19.255	132.58	142.758	4.33529	0.928813
	38.8544	114.973		19.427	133.412	144.155	4.70208	1.09617
	39.1982	122.057		19.599	133.35	144.05	4.67474	1.0836
	39.5421	117.783		19.771	133.148	143.685	4.58569	1.03987
	39.8859	116.887		19.943	133.523	143.129	4.75101	0.973259
	40.2298	118.301		20.115	133.717	143.866	4.83653	1.06155
	40.5736	111.137		20.287	133.407	143.836	4.69987	1.05796
	40.9174	103.549		20.459	134.442	143.848	5.15615	1.0594
	41.2613	102.109		20.631	134.663	143.771	5.25358	1.05017
	41.6051	99.804		20.803	133.923	144.608	4.92735	1.15044
	41.949	100.378		20.974	134.422	143.979	5.14733	1.07509
	42.2928	103.435		21.146	134.997	144.088	5.40082	1.08815
	42.6367	115.832		21.318	134.513	144.006	5.18745	1.07832
	42.9805	129.899		21.49	133.742	143.498	4.84756	1.01747
	43.3244	138.699		21.662	133.708	143.415	4.83257	1.00752
	43.6682	147.309		21.834	133.96	143.526	4.94366	1.02082
	44.012	157.629		22.006	134.394	143.671	5.13499	1.03819
	44.3559	156.232		22.178	134.303	143.851	5.09487	1.05976
	44.6997	165.593		22.35	133.683	143.533	4.82155	1.02166
	45.0436	164.5		22.522	135.071	143.577	5.43344	1.02693
	45.3874	159.348		22.694	134.82	143.191	5.32279	0.980687
	45.7313	157.592		22.866	135.322	144.152	5.54409	1.09582
	46.0751	160.645		23.038	134.903	143.757	5.35938	1.04849
	46.4189	162.483		23.209	135.369	143.553	5.56481	1.02405
	46.7628	162.809		23.381	135.257	144.138	5.51544	1.09414
	47.1066	172.979		23.553	134.619	143.905	5.23418	1.06622
	47.4505	186.397		23.725	134.57	143.228	5.21258	0.98512
	47.7943	180.763		23.897	135.323	143.099	5.54453	0.969665
	48.1382	172.967		24.069	136.234	143.434	5.94615	1.0098
	48.482	180.703		24.241	134.467	144.239	5.16717	1.10624
	48.8259	204.54		24.413	135.421	143.884	5.58774	1.06371
	49.1697	230.825		24.585	135.191	144.022	5.48634	1.08024
	49.5135	249.821		24.757	135.627	143.003	5.67855	0.958164
	49.8574	249.543		24.929	136.711	144.978	6.15643	1.19477
	50.2012	247.752		25.101	136.917	143.837	6.24724	1.05808
	50.5451	222.537		25.273	136.083	144.441	5.87958	1.13044
	50.8889	202.445		25.444	136.3	144.388	5.97524	1.12409
	51.2328	197.828		25.616	136.973	144.465	6.27193	1.13331
	51.5766	195.865		25.788	136.8	143.65	6.19567	1.03568
	51.9205	203.028		25.96	135.214	143.634	5.49648	1.03376
	52.2643	208.618		26.132	135.264	144.039	5.51852	1.08228
	52.6081	212.697		26.304	134.963	144.656	5.38583	1.15619
	52.952	222.714		26.476	135.554	144.175	5.64637	1.09857
	53.2958	243.112		26.648	135.489	145.157	5.61772	1.21621
	53.6397	285.284		26.82	135.428	143.846	5.59082	1.05916
	53.9835	298.777		26.992	134.4	145.186	5.13763	1.21969
	54.3274	256.452		27.164	134.843	144.971	5.33293	1.19393
	54.6712	244.352		27.336	134.684	144.139	5.26283	1.09426
	55.0151	235.091		27.508	134.69	144.946	5.26548	1.19094
	55.3589	252.872		27.679	135.724	145.151	5.72131	1.2155
	55.7027	278.933		27.851	136.617	144.482	6.11499	1.13535
	56.0466	328.122		28.023	135.035	145.564	5.41757	1.26497
	56.3904	366.919		28.195	135.526	145.649	5.63403	1.27516
	56.7343	432.675		28.367	137.432	145.931	6.47428	1.30894
	57.0781	487.902		28.539	136.467	145.322	6.04886	1.23598
	57.422	451.755		28.711	135.448	144.53	5.59964	1.1411
	57.7658	437.99		28.883	135.358	144.118	5.55996	1.09174
	58.1096	458.166		29.055	136.218	144.911	5.93909	1.18674
	58.4535	519.362		29.227	136.902	145.555	6.24063	1.2639
	58.7973	552.966		29.399	135.679	145.754	5.70148	1.28774
	59.1412	525.157		29.571	135.602	144.797	5.66753	1.17309
	59.485	493.779		29.743	136.218	146.65	5.93909	1.39508
	59.8289	496.582		29.914	135.618	145.365	5.67458	1.24113
	60.1727	473.542		30.086	137.042	144.992	6.30235	1.19645
	60.5166	473.53		30.258	137.366	144.756	6.44519	1.16817
	60.8604	492.553		30.43	136.37	145.27	6.0061	1.22975
	61.2042	486.421		30.602	135.57	144.741	5.65342	1.16638
	61.5481	486.046		30.774	136.778	145.045	6.18597	1.2028
	61.8919	473.664		30.946	136.614	144.862	6.11367	1.18087
	62.2358	479.465		31.118	136.399	143.506	6.01889	1.01842
	62.5796	567.418		31.29	136.371	144.355	6.00654	1.12013
	62.9235	624.405		31.462	137.076	143.799	6.31734	1.05353
	63.2673	596.269		31.634	137.58	143.883	6.53953	1.06359
	63.6112	568.206		31.806	137.673	144.465	6.58053	1.13331
	63.955	601.691		31.977	137.837	144.357	6.65282	1.12037
	64.2988	654.567		32.149	137.112	143.85	6.33321	1.05964
	64.6427	711.943		32.321	137.272	143.972	6.40375	1.07425
	64.9865	732.553		32.493	137.451	145.042	6.48266	1.20244
	65.3304	750.289		32.665	136.721	144.237	6.16084	1.106
	65.6742	756.549		32.837	137.12	144.514	6.33674	1.13918
	66.0181	715.407		33.009	137.456	144.271	6.48486	1.11007
	66.3619	623.052		33.181	136.935	144.068	6.25518	1.08575
	66.7058	581.872		33.353	137.006	145.192	6.28648	1.22041
	67.0496	574.941		33.525	138.148	144.828	6.78993	1.1768
	67.3934	559.518		33.697	137.616	144.906	6.5554	1.18614
	67.7373	548.857		33.869	137.815	144.076	6.64313	1.08671
	68.0811	548.837		34.041	138.735	144.789	7.0487	1.17213
	68.425	556.786		34.212	137.839	144.831	6.65371	1.17716
	68.7688	551.826		34.384	137.795	143.907	6.63431	1.06646
	69.1127	535.968		34.556	136.796	143.772	6.1939	1.05029
	69.4565	526.705		34.728	137.198	143.601	6.37112	1.02981
	69.8003	538.75		34.9	137.146	143.853	6.3482	1.05999
	70.1442	543.564		35.072	137.727	143.517	6.60433	1.01974
	70.488	566.144		35.244	138.53	144.373	6.95833	1.12229
	70.8319	575.911		35.416	138.608	144.009	6.99272	1.07868
	71.1757	516.812		35.588	137.648	144.419	6.5695	1.1278
	71.5196	487.801		35.76	138.116	144.042	6.77582	1.08264
	71.8634	459.198		35.932	137.378	143.576	6.45048	1.02681
	72.2073	439.588		36.104	137.455	144.3	6.48442	1.11355
	72.5511	404.194		36.276	137.504	145.003	6.50602	1.19777
	72.8949	400.661		36.447	136.674	144.872	6.14012	1.18207
	73.2388	418.798		36.619	136.824	144.329	6.20625	1.11702
	73.5826	455.853		36.791	137.509	145.029	6.50823	1.20088
	73.9265	499.19		36.963	137.91	145.268	6.68501	1.22951
	74.2703	485.544		37.135	137.185	145.978	6.36539	1.31457
	74.6142	480.551		37.307	138.19	145.458	6.80844	1.25227
	74.958	488.894		37.479	138.564	145.205	6.97332	1.22197
	75.3019	490.617		37.651	137.248	144.122	6.39317	1.09222
	75.6457	485.907		37.823	137.744	144.666	6.61183	1.15739
	75.9895	442.916		37.995	138.317	146.021	6.86443	1.31972
	76.3334	420.068		38.167	137.769	145.165	6.62285	1.21717
	76.6772	420.235		38.339	137.138	145.186	6.34467	1.21969
	77.0211	427.604		38.511	137.366	147.31	6.44519	1.47415
	77.3649	431.65		38.682	137.735	148.301	6.60786	1.59287
	77.7088	417.462		38.854	137.408	149.083	6.4637	1.68655
	78.0526	407.172		39.026	136.873	150	6.22785	1.79641
	78.3964	467.049		39.198	138.28	149.862	6.84812	1.77988
	78.7403	581.407		39.37	138.159	149.941	6.79478	1.78934
	79.0841	718.161		39.542	137.736	149.727	6.6083	1.7637
	79.428	657.687		39.714	137.737	149.488	6.60874	1.73507
	79.7718	530.339		39.886	137.748	149.702	6.61359	1.76071
	80.1157	440.799		40.058	137.316	149.922	6.42314	1.78706
	80.4595	418.495		40.23	137.693	150.705	6.58934	1.88087
	80.8034	446.754		40.402	137.853	150.401	6.65988	1.84445
	81.1472	450.82		40.574	137.102	149.916	6.3288	1.78635
	81.491	463.445		40.746	137.378	148.491	6.45048	1.61563
	81.8349	478.903		40.917	137.309	148.515	6.42006	1.6185
	82.1787	496.756		41.089	136.751	149.516	6.17406	1.73843
	82.5226	473.963		41.261	137.87	149.56	6.66737	1.7437
	82.8664	500.414		41.433	137.888	148.835	6.67531	1.65684
	83.2103	554.526		41.605	137.537	148.736	6.52057	1.64498
	83.5541	541.915		41.777	138.183	147.544	6.80536	1.50218
	83.898	564.931		41.949	138.739	148.161	7.05047	1.5761
	84.2418	533.926		42.121	138.134	147.574	6.78376	1.50577
	84.5856	495.795		42.293	137.672	146.241	6.58008	1.34608
	84.9295	460.835		42.465	137.638	146.942	6.5651	1.43006
	85.2733	402.678		42.637	136.969	146.72	6.27017	1.40346
	85.6172	370.686		42.809	137.462	146.133	6.48751	1.33314
	85.961	378.536		42.981	136.881	145.668	6.23137	1.27743
	86.3049	372.748		43.152	137.429	145.644	6.47296	1.27456
	86.6487	378.23		43.324	136.499	144.263	6.06297	1.10911
	86.9926	418.748		43.496	137.997	145.781	6.72336	1.29097
	87.3364	396.576		43.668	137.722	145.842	6.60213	1.29828
	87.6802	386.936		43.84	138.271	145.339	6.84415	1.23802
	88.0241	378.101		44.012	137.447	145.64	6.48089	1.27408
	88.3679	412.913		44.184	138.063	145.756	6.75246	1.28798
	88.7118	414.245		44.356	138.387	145.906	6.89529	1.30595
	89.0556	375.235		44.528	137.918	146.111	6.68853	1.3305
	89.3995	364.27		44.7	137.781	144.889	6.62814	1.18411
	89.7433	382.263		44.872	137.788	145.779	6.63122	1.29073
	90.0871	382.094		45.044	139.245	145.916	7.27354	1.30714
	90.431	379.187		45.215	138.654	145.58	7.013	1.26689
	90.7748	382.839		45.387	138.386	144.714	6.89485	1.16314
	91.1187	409.772		45.559	138.747	145.777	7.05399	1.29049
	91.4625	424.373		45.731	138.079	146.381	6.75951	1.36285
	91.8064	432.402		45.903	137.94	146.065	6.69823	1.32499
	92.1502	444.332		46.075	138.614	145.711	6.99536	1.28258
	92.4941	442.383		46.247	138.726	145.726	7.04474	1.28438
	92.8379	447.293		46.419	139.058	145.461	7.1911	1.25263
	93.1817	475.703		46.591	139.459	146.044	7.36788	1.32248
	93.5256	481.989		46.763	139.617	146.043	7.43753	1.32236
	93.8694	473.073		46.935	139.347	146.689	7.3185	1.39975
	94.2133	517.864		47.107	139.737	145.433	7.49043	1.24928
	94.5571	503.638		47.279	142.383	146.454	8.65692	1.3716
	94.901	460.482		47.45	141.263	145.536	8.16317	1.26162
	95.2448	401.122		47.622	140.211	145.804	7.6994	1.29373
	95.5887	354.14		47.794	139.397	144.962	7.34055	1.19285
	95.9325	343.198		47.966	139.927	145.5	7.57419	1.25731
	96.2763	344.935		48.138	139.678	145.208	7.46442	1.22232
	96.6202	354.862		48.31	138.952	145.052	7.14437	1.20364
	96.964	380.333		48.482	139.246	145.912	7.27398	1.30666
	97.3079	433.986		48.654	139.368	145.742	7.32776	1.2863
	97.6517	444.853		48.826	138.182	145.807	6.80492	1.29409
	97.9956	396.659		48.998	137.372	145.866	6.44783	1.30115
	98.3394	352.065		49.17	137.114	145.903	6.33409	1.30559
	98.6832	334.295		49.342	136.302	144.626	5.97612	1.1526
	99.0271	335.439		49.514	136.645	146.057	6.12733	1.32404
	99.3709	306.395		49.685	136.723	145.49	6.16172	1.25611
	99.7148	318.169		49.857	136.331	145.633	5.98891	1.27324
	100.059	342.375		50.029	135.977	145.448	5.83285	1.25108
	100.402	355.58		50.201	136.155	145.263	5.91132	1.22891
	100.746	355.27		50.373	136.065	145.383	5.87164	1.24329
	101.09	324.937		50.545	135.936	145.259	5.81477	1.22843
	101.434	289.63		50.717	137.311	145.277	6.42094	1.23059
	101.778	276.287		50.889	138.526	144.552	6.95657	1.14374
	102.122	305.489		51.061	137.981	145.576	6.71631	1.26641
	102.466	303.758		51.233	137.143	145.422	6.34688	1.24796
	102.809	294.657		51.405	137.078	143.245	6.31822	0.987156
	103.153	329.364		51.577	136.582	144.495	6.09956	1.13691
	103.497	324.103		51.749	135.967	144.552	5.82844	1.14374
	103.841	297.3		51.92	136.352	145.489	5.99817	1.25599
	104.185	261.329		52.092	136.576	144.404	6.09692	1.126
	104.529	237.892		52.264	137.673	145.114	6.58053	1.21106
	104.872	241.766		52.436	136.686	144.35	6.14541	1.11954
	105.216	309.556		52.608	138.274	145.451	6.84547	1.25144
	105.56	410.83		52.78	137.182	145.522	6.36407	1.25994
	105.904	470.166		52.952	138.032	145.913	6.73879	1.30678
	106.248	413.352		53.124	138.762	144.159	7.06061	1.09665
	106.592	415.627		53.296	138.095	145.198	6.76656	1.22113
	106.936	413.912		53.468	138.474	144.967	6.93364	1.19345
	107.279	333.411		53.64	137.802	145.722	6.63739	1.2839
	107.623	308.204		53.812	138.612	145.106	6.99448	1.2101
	107.967	303.882		53.984	138.549	145.712	6.96671	1.2827
	108.311	334.805		54.155	138.483	145.427	6.93761	1.24856
	108.655	366.758		54.327	139.326	144.901	7.30925	1.18555
	108.999	380.931		54.499	138.934	145.674	7.13643	1.27815
	109.342	444.74		54.671	139.997	145.756	7.60505	1.28798
	109.686	464.16		54.843	139.581	145.385	7.42166	1.24353
	110.03	384.885		55.015	139.632	144.943	7.44414	1.19058
	110.374	322.061		55.187	139.942	145.192	7.58081	1.22041
	110.718	297.659		55.359	138.877	145.926	7.11131	1.30834
	111.062	316.741		55.531	138.39	146.041	6.89661	1.32212
	111.405	295.326		55.703	137.766	145.74	6.62152	1.28606
	111.749	305.71		55.875	138.201	145.42	6.81329	1.24772
	112.093	338.854		56.047	139.871	144.8	7.54951	1.17345
	112.437	350.974		56.219	138.497	145.374	6.94378	1.24221
	112.781	316.703		56.39	138.437	145.284	6.91733	1.23143
	113.125	300.957		56.562	138.871	144.789	7.10866	1.17213
	113.469	306.265		56.734	138.711	145.331	7.03812	1.23706
	113.812	306.669		56.906	139.742	145.383	7.49264	1.24329
	114.156	301.419		57.078	140.779	145.88	7.9498	1.30283
	114.5	295.183		57.25	140.022	146.788	7.61608	1.41161
	114.844	282.075		57.422	141.424	146.287	8.23414	1.35159
	115.188	278.886		57.594	141.164	147.402	8.11952	1.48517
	115.532	280.762		57.766	140.534	148.708	7.84179	1.64163
	115.875	293.528		57.938	141.187	150.889	8.12966	1.90291
	116.219	326.348		58.11	141.209	153.256	8.13936	2.18648
	116.563	378.065		58.282	142.521	156.765	8.71775	2.60686
	116.907	360.163		58.453	142.623	161.833	8.76272	3.21401
	117.251	357.811		58.625	143.311	168.84	9.06602	4.05345
	117.595	338.932		58.797	144.691	179.479	9.67439	5.32801
	117.939	318.356		58.969	145.674	183.469	10.1077	5.80601
	118.282	301.965		59.141	146.722	185.057	10.5698	5.99626
	118.626	293.353		59.313	148.808	186.74	11.4894	6.19788
	118.97	273.81		59.485	149.279	188.975	11.697	6.46563
	119.314	278.491		59.657	150.027	188.124	12.0268	6.36368
	119.658	297.064		59.829	150.626	186.397	12.2908	6.15679
	120.002	303.464		60.001	151.144	182.674	12.5192	5.71077
	120.345	300.217		60.173	151.514	177.447	12.6823	5.08457
	120.689	314.736		60.345	151.803	175.173	12.8097	4.81215
	121.033	319.429		60.517	152.731	171.622	13.2188	4.38674
	121.377	279.833		60.688	152.352	168.797	13.0517	4.0483
	121.721	268.538		60.86	153.377	166.71	13.5036	3.79828
	122.065	277.845		61.032	153.306	164.457	13.4723	3.52836
	122.408	253.991		61.204	152.699	163.304	13.2047	3.39023
	122.752	269.419		61.376	151.819	163.014	12.8167	3.35549
	123.096	241.768		61.548	151.051	163.471	12.4782	3.41024
	123.44	221.324		61.72	150.174	163.439	12.0916	3.40641
	123.784	198.937		61.892	148.956	164.694	11.5546	3.55676
	124.128	188.497		62.064	148.984	165.157	11.5669	3.61222
	124.472	205.232		62.236	148.374	163.6	11.298	3.4257
	124.815	218.774		62.408	147.993	163.735	11.1301	3.44187
	125.159	220.397		62.58	148.796	163.618	11.4841	3.42785
	125.503	252.444		62.752	149.502	161.9	11.7953	3.22203
	125.847	317.209		62.923	149.335	160.613	11.7217	3.06785
	126.191	299.492		63.095	146.678	159.961	10.5504	2.98974
	126.535	248.401		63.267	145.602	160.729	10.076	3.08175
	126.878	212.794		63.439	144.346	157.59	9.5223	2.70569
	127.222	183.036		63.611	143.973	155.137	9.35786	2.41182
	127.566	202.549		63.783	144.691	153.983	9.67439	2.27357
	127.91	207.851		63.955	143.915	153.606	9.33229	2.22841
	128.254	191.299		64.127	142.162	151.045	8.55949	1.9216
	128.598	214.208		64.299	141.298	151.003	8.1786	1.91657
	128.942	208.024		64.471	140.793	150.218	7.95597	1.82253
	129.285	199.476		64.643	140.992	151.393	8.0437	1.96329
	129.629	188.032		64.815	141.654	150.089	8.33554	1.80707
	129.973	174.336		64.987	143.065	151.652	8.95757	1.99432
	130.317	161.727		65.158	143.892	150.525	9.32215	1.8593
	130.661	173.559		65.33	146.216	151.063	10.3467	1.92376
	131.005	183.383		65.502	147.442	151.102	10.8872	1.92843
	131.348	207.099		65.674	144.38	150.384	9.53729	1.84241
	131.692	210.173		65.846	142.526	150.195	8.71996	1.81977
	132.036	195.423		66.018	140.921	150.518	8.0124	1.85847
	132.38	192.859		66.19	140.695	150.734	7.91277	1.88434
	132.724	177.575		66.362	140.055	151.576	7.63062	1.98521
	133.068	159.049		66.534	139.907	150.724	7.56538	1.88314
	133.412	163.041		66.706	140.203	150.242	7.69587	1.8254
	133.755	176.641		66.878	141.447	150.547	8.24428	1.86194
	134.099	204.017		67.05	142.971	151.056	8.91613	1.92292
	134.443	233.362		67.222	144.296	149.495	9.50026	1.73591
	134.787	236.924		67.393	142.77	148.47	8.82752	1.61311
	135.131	220.248		67.565	141.47	148.22	8.25442	1.58316
	135.475	224.572		67.737	141.214	147.545	8.14156	1.5023
	135.818	214.636		67.909	140.779	147.502	7.9498	1.49715
	136.162	202.345		68.081	139.762	148.271	7.50145	1.58927
	136.506	191.197		68.253	139.365	147.5	7.32644	1.49691
	136.85	196.805		68.425	137.843	148.106	6.65547	1.56951
	137.194	200.255		68.597	138.716	147.727	7.04033	1.5241
	137.538	209.71		68.769	139.116	148.302	7.21667	1.59299
	137.881	187.76		68.941	138.97	148.411	7.1523	1.60605
	138.225	156.189		69.113	139.15	149.679	7.23166	1.75795
	138.569	144.511		69.285	139.071	149.873	7.19683	1.78119
	138.913	140.129		69.457	139.311	150.742	7.30263	1.8853
	139.257	146.748		69.628	139.884	149.564	7.55524	1.74418
	139.601	172.761		69.8	140.074	150.229	7.639	1.82384
	139.945	202.077		69.972	138.902	150.792	7.12233	1.89129
	140.288	197.623		70.144	141.262	150.4	8.16273	1.84433
	140.632	182.599		70.316	142.554	151.653	8.7323	1.99444
	140.976	179.716		70.488	141.675	151.127	8.3448	1.93142
	141.32	180.321		70.66	141.842	149.904	8.41842	1.78491
	141.664	183.308		70.832	141.787	150.42	8.39417	1.84672
	142.008	189.525		71.004	141.757	149.885	8.38094	1.78263
	142.351	208.159		71.176	141.696	150.061	8.35405	1.80372
	142.695	211.867		71.348	141.501	150.775	8.26809	1.88925
	143.039	171.87		71.52	141.137	149.702	8.10762	1.76071
	143.383	174.58		71.691	142.771	149.337	8.82796	1.71698
	143.727	179.734		71.863	143.403	149.924	9.10658	1.7873
	144.071	167.286		72.035	143.332	149.134	9.07528	1.69266
	144.415	181.966		72.207	141.92	150.496	8.4528	1.85583
	144.758	186.653		72.379	141.852	148.947	8.42283	1.67026
	145.102	162.624		72.551	142.28	148.914	8.61151	1.66631
	145.446	137.205		72.723	143.051	147.906	8.9514	1.54555
	145.79	141.589		72.895	143.773	148.603	9.26969	1.62905
	146.134	147.789		73.067	144.353	148.845	9.52538	1.65804
	146.478	140.329		73.239	145.052	149.175	9.83354	1.69757
	146.821	137.647		73.411	146.754	148.665	10.5839	1.63647
	147.165	132.691		73.583	146.264	147.934	10.3678	1.5489
	147.509	125.731		73.755	148.209	148.701	11.2253	1.64079
	147.853	130.46		73.926	149.461	148.437	11.7772	1.60916
	148.197	127.987		74.098	150.991	148.835	12.4517	1.65684
	148.541	116.076		74.27	149.934	147.835	11.9858	1.53704
	148.884	126.486		74.442	148.321	148.512	11.2747	1.61815
	149.228	129.21		74.614	147.768	149.388	11.0309	1.72309
	149.572	126.798		74.786	146.739	149.306	10.5772	1.71327
	149.916	133.877		74.958	144.942	150.114	9.78504	1.81007
	150.26	131.453		75.13	145.624	151.483	10.0857	1.97407
	150.604	123.067		75.302	144.873	151.532	9.75462	1.97994
	150.948	117.123		75.474	144.788	151.092	9.71715	1.92723
	151.291	126.621		75.646	144.26	152.083	9.48439	2.04595
	151.635	138.099		75.818	145.086	152.598	9.84852	2.10765
	151.979	127.654		75.99	144.288	153.708	9.49673	2.24063
	152.323	118.648		76.161	144.222	153.174	9.46763	2.17666
	152.667	124.901		76.333	144.363	154.615	9.52979	2.34929
	153.011	119.875		76.505	143.002	153.902	8.9298	2.26387
	153.354	116.339		76.677	142.708	154.339	8.80019	2.31622
	153.698	115.012		76.849	143.345	154.32	9.08101	2.31395
	154.042	113.105		77.021	142.555	153.717	8.73274	2.24171
	154.386	109.569		77.193	143.146	154.925	8.99328	2.38643
	154.73	102.657		77.365	142.613	153.62	8.75831	2.23009
	155.074	99.191		77.537	141.76	154.252	8.38227	2.3058
	155.418	98.226		77.709	142.963	152.538	8.91261	2.10046
	155.761	105.622		77.881	143.844	153.039	9.30099	2.16048
	156.105	104.614		78.053	144.373	153.987	9.5342	2.27405
	156.449	99.667		78.225	144.554	153.907	9.61399	2.26447
	156.793	94.183		78.396	144.843	152.914	9.7414	2.14551
	157.137	87.939		78.568	144.538	153.174	9.60694	2.17666
	157.481	85.73		78.74	145.501	151.93	10.0315	2.02762
	157.824	89.767		78.912	146.012	152.597	10.2567	2.10753
	158.168	88.798		79.084	145.94	152.243	10.225	2.06512
	158.512	90.647		79.256	145.251	152.046	9.92126	2.04152
	158.856	92.555		79.428	144.997	151.271	9.80929	1.94868
	159.2	100.628		79.6	143.777	151.043	9.27146	1.92136
	159.544	101.229		79.772	142.924	150.643	8.89541	1.87344
	159.887	95.017		79.944	142.521	150.131	8.71775	1.8121
	160.231	95.73		80.116	143.241	150.572	9.03516	1.86493
	160.575	92.81		80.288	143.073	150.669	8.9611	1.87656
	160.919	94.857		80.46	143.102	151.534	8.97388	1.98018
	161.263	98.141		80.631	143.701	152.502	9.23795	2.09615
	161.607	104.086		80.803	144.322	150.801	9.51172	1.89237
	161.951	108.664		80.975	146.261	150.693	10.3665	1.87943
	162.294	102.298		81.147	144.3	151.072	9.50202	1.92483
	162.638	96.764		81.319	141.994	151.56	8.48543	1.9833
	162.982	92.869		81.491	141.986	150.275	8.4819	1.82935
	163.326	90.437		81.663	142.529	150.342	8.72128	1.83738
	163.67	98.476		81.835	142.563	149.897	8.73627	1.78407
	164.014	104.294		82.007	143.446	150.46	9.12554	1.85152
	164.357	101.722		82.179	143.684	150.022	9.23046	1.79904
	164.701	101.596		82.351	142.747	151.673	8.81738	1.99683
	165.045	109.955		82.523	142.228	149.931	8.58858	1.78814
	165.389	115.814		82.694	142.873	149.181	8.87293	1.69829
	165.733	113.021		82.866	143.275	149.977	9.05015	1.79365
	166.077	108.455		83.038	142.603	149.549	8.7539	1.74238
	166.421	106.536		83.21	143.32	149.569	9.06999	1.74477
	166.764	115.76		83.382	143.91	150.154	9.33009	1.81486
	167.108	122.552		83.554	144.683	149.592	9.67086	1.74753
	167.452	102.768		83.726	145.408	149.33	9.99048	1.71614
	167.796	93.751		83.898	145.394	150.638	9.98431	1.87284
	168.14	90.916		84.07	146.296	150.676	10.3819	1.87739
	168.484	88.85		84.242	146.367	149.62	10.4133	1.75088
	168.827	83.362		84.414	145.348	149.848	9.96403	1.7782
	169.171	85.965		84.586	145.596	149.5	10.0734	1.73651
	169.515	86.173		84.758	144.971	149.593	9.79783	1.74765
	169.859	83.494		84.929	144.811	149.376	9.72729	1.72165
	170.203	82.734		85.101	146.013	150.259	10.2572	1.82744
	170.547	86.454		85.273	147.443	149.784	10.8876	1.77053
	170.891	87.708		85.445	149.496	150.366	11.7927	1.84026
	171.234	83.584		85.617	149.481	150.248	11.786	1.82612
	171.578	76.597		85.789	150.622	149.65	12.2891	1.75448
	171.922	76.669		85.961	151.158	151.175	12.5253	1.93717
	172.266	82.767		86.133	152.097	151.565	12.9393	1.9839
	172.61	81.603		86.305	150.245	151.665	12.1229	1.99588
	172.954	77.452		86.477	148.664	150.663	11.4259	1.87584
	173.297	74.94		86.649	147.606	151.298	10.9595	1.95191
	173.641	76.668		86.821	148.353	151.238	11.2888	1.94472
	173.985	76.159		86.993	147.033	150.961	10.7069	1.91154
	174.329	75.781		87.164	147.544	150.101	10.9321	1.80851
	174.673	76.685		87.336	147.623	149.87	10.967	1.78083
	175.017	71.678		87.508	148.566	150.458	11.3827	1.85128
	175.36	70.988		87.68	148.753	149.443	11.4651	1.72968
	175.704	75.967		87.852	147.933	149.221	11.1036	1.70308
	176.048	77.904		88.024	146.302	149.834	10.3846	1.77652
	176.392	76.577		88.196	145.407	151.244	9.99004	1.94544
	176.736	79.486		88.368	146.046	150.656	10.2717	1.875
	177.08	86.444		88.54	145.343	150.037	9.96182	1.80084
	177.424	86.974		88.712	145.379	148.957	9.97769	1.67146
	177.767	83.726		88.884	144.904	150.03	9.76829	1.8
	178.111	77.923		89.056	144.827	150.057	9.73435	1.80324
	178.455	76.117		89.228	145.623	149.189	10.0853	1.69925
	178.799	77.765		89.399	145.436	149.683	10.0028	1.75843
	179.143	73.168		89.571	144.629	150.029	9.64706	1.79988
	179.487	74.841		89.743	145.215	150.139	9.90539	1.81306
	179.83	72.919		89.915	146.015	149.923	10.2581	1.78718
	180.174	74.745		90.087	147.086	151.399	10.7302	1.96401
	180.518	74.068		90.259	145.941	150.935	10.2254	1.90842
	180.862	71.127		90.431	146.619	150.378	10.5243	1.84169
	181.206	69.645		90.603	146.518	150.546	10.4798	1.86182
	181.55	69.915		90.775	146.505	150.049	10.4741	1.80228
	181.894	69.734		90.947	147.417	149.895	10.8761	1.78383
	182.237	70.869		91.119	146.861	150.226	10.631	1.82348
	182.581	71.524		91.291	148.211	150.423	11.2262	1.84708
	182.925	68.129		91.463	147.672	151.587	10.9886	1.98653
	183.269	68.94		91.634	148.508	153.522	11.3571	2.21835
	183.613	70.965		91.806	147.943	154.601	11.108	2.34761
	183.957	71.582		91.978	147.098	154.893	10.7355	2.38259
	184.3	71.813		92.15	146.599	153.094	10.5155	2.16707
	184.644	70.356		92.322	146.64	152.565	10.5336	2.1037
	184.988	74.948		92.494	144.996	152.289	9.80885	2.07063
	185.332	73.63		92.666	146.756	151.598	10.5847	1.98785
	185.676	73.586		92.838	146.871	151.11	10.6354	1.92939
	186.02	72.853		93.01	147.754	152.497	11.0247	2.09555
	186.363	72.397		93.182	148.349	152.932	11.287	2.14766
	186.707	73.388		93.354	150.102	152.707	12.0598	2.12071
	187.051	69.222		93.526	151.66	153.417	12.7467	2.20577
	187.395	65.362		93.698	150.465	153.219	12.2198	2.18205
	187.739	65.312		93.869	148.957	152.94	11.555	2.14862
	188.083	66.965		94.041	148.147	152.548	11.198	2.10166
	188.427	69.411		94.213	149.073	153.115	11.6062	2.16959
	188.77	65.162		94.385	150.138	153.646	12.0757	2.2332
	189.114	66.704		94.557	150.46	155.396	12.2176	2.44285
	189.458	69.497		94.729	150.441	155.168	12.2093	2.41554
	189.802	69.334		94.901	151.93	155.385	12.8657	2.44153
	190.146	68.937		95.073	152.349	155.962	13.0504	2.51066
	190.49	64.948		95.245	151.203	154.709	12.5452	2.36055
	190.833	64.084		95.417	149.958	152.962	11.9963	2.15126
	191.177	68.076		95.589	149.829	152.494	11.9395	2.09519
	191.521	70.046		95.761	149.065	152.848	11.6027	2.1376
	191.865	63.67		95.932	149.761	152.396	11.9095	2.08345
	192.209	62.724		96.104	149.047	152.362	11.5947	2.07938
	192.553	62.786		96.276	149.539	152.647	11.8116	2.11352
	192.897	64.242		96.448	149.333	152.471	11.7208	2.09244
	193.24	65.469		96.62	150.114	151.818	12.0651	2.01421
	193.584	65.449		96.792	148.84	151.679	11.5035	1.99755
	193.928	68.022		96.964	149.728	151.849	11.8949	2.01792
	194.272	70.731		97.136	150.416	150.621	12.1982	1.8708
	194.616	66.293		97.308	151.24	151.413	12.5615	1.96569
	194.96	59.45		97.48	153.229	152.498	13.4383	2.09567
	195.303	57.912		97.652	153.571	154.313	13.5891	2.31311
	195.647	61.712		97.824	155.193	156.883	14.3042	2.621
	195.991	63.037		97.996	157.997	159.92	15.5403	2.98483
	196.335	62.489		98.167	158.229	162.013	15.6426	3.23557
	196.679	63.469		98.339	156.948	162.223	15.0779	3.26073
	197.023	66.844		98.511	156.356	160.55	14.8169	3.0603
	197.366	68.875		98.683	154.623	159.066	14.0529	2.88252
	197.71	66.815		98.855	154.409	156.335	13.9585	2.55534
	198.054	66.784		99.027	156.553	156.074	14.9037	2.52408
	198.398	69.1		99.199	156.059	156.714	14.6859	2.60075
	198.742	66.329		99.371	155.716	154.318	14.5347	2.31371
	199.086	65.435		99.543	155.556	153.53	14.4642	2.2193
	199.43	65.289		99.715	154.274	154.424	13.899	2.32641
	199.773	63.778		99.887	151.215	153.556	12.5505	2.22242
	200.117	60.748		100.059	151.263	151.936	12.5716	2.02834
	200.461	56.268		100.231	150.565	150.497	12.2639	1.85595
	200.805	59.346		100.402	150.933	150.727	12.4262	1.8835
	201.149	60.109		100.574	151.117	150.877	12.5073	1.90147
	201.493	57.361		100.746	150.745	150.871	12.3433	1.90075
	201.836	55.771		100.918	150.927	151.879	12.4235	2.02151
	202.18	56.394		101.09	151.91	152.809	12.8569	2.13293
	202.524	57.426		101.262	154.303	155.349	13.9118	2.43722
	202.868	55.56		101.434	155.578	156.637	14.4739	2.59152
	203.212	56.95		101.606	157.566	158.808	15.3503	2.85161
	203.556	58.633		101.778	156.295	158.375	14.79	2.79974
	203.9	58.503		101.95	154.603	157.157	14.0441	2.65382
	204.243	58.284		102.122	154.221	154.577	13.8757	2.34474
	204.587	57.581		102.294	153.588	153.845	13.5966	2.25704
	204.931	58.576		102.466	154.799	155.268	14.1305	2.42752
	205.275	59.35		102.637	155.386	155.935	14.3893	2.50742
	205.619	59.084		102.809	157.663	156.107	15.3931	2.52803
	205.963	59.207		102.981	156.312	154.389	14.7975	2.32221
	206.306	57.419		103.153	155.581	153.696	14.4752	2.23919
	206.65	58.72		103.325	154.337	151.906	13.9268	2.02475
	206.994	58.28		103.497	153.362	151.648	13.497	1.99384
	207.338	57.779		103.669	152.792	153.064	13.2457	2.16348
	207.682	56.496		103.841	154.079	152.666	13.8131	2.1158
	208.026	56.113		104.013	154.425	153.72	13.9656	2.24207
	208.37	56.334		104.185	153.719	152.885	13.6544	2.14203
	208.713	54.718		104.357	155.436	154.298	14.4113	2.31131
	209.057	54.263		104.529	154.675	155.662	14.0758	2.47472
	209.401	55.263		104.701	153.778	154.947	13.6804	2.38906
	209.745	56.493		104.872	152.21	154.642	12.9891	2.35252
	210.089	57.371		105.044	152.227	153.162	12.9966	2.17522
	210.433	56.015		105.216	152.347	154.168	13.0495	2.29574
	210.776	54.771		105.388	152.259	154.39	13.0107	2.32233
	211.12	53.022		105.56	151.842	154.769	12.8269	2.36774
	211.464	54.499		105.732	150.41	153.183	12.1956	2.17773
	211.808	52.829		105.904	149.575	151.815	11.8275	2.01385
	212.152	50.963		106.076	150.965	152.409	12.4403	2.08501
	212.496	54.701		106.248	151.466	151.323	12.6611	1.9549
	212.839	56.199		106.42	152.096	152.741	12.9389	2.12478
	213.183	56.935		106.592	150.941	152.866	12.4297	2.13976
	213.527	54.881		106.764	150.621	153.141	12.2886	2.1727
	213.871	53.28		106.936	151.29	153.557	12.5835	2.22254
	214.215	53.467		107.107	152.154	153.462	12.9644	2.21116
	214.559	53.144		107.279	152.639	153.464	13.1782	2.2114
	214.903	54.482		107.451	153.187	154.259	13.4198	2.30664
	215.246	54.854		107.623	154.519	153.95	14.007	2.26962
	215.59	54.468		107.795	155.527	153.193	14.4514	2.17893
	215.934	52.662		107.967	156.465	153.83	14.8649	2.25524
	216.278	50.151		108.139	157.457	154.262	15.3022	2.307
	216.622	50.322		108.311	158.888	152.799	15.9331	2.13173
	216.966	49.423		108.483	162.287	153.213	17.4315	2.18133
	217.309	48.683		108.655	164.313	153.335	18.3247	2.19594
	217.653	49.938		108.827	167.474	155.274	19.7182	2.42824
	217.997	51.428		108.999	166.016	155.061	19.0755	2.40272
	218.341	52.233		109.17	166.035	154.41	19.0838	2.32473
	218.685	48.803		109.342	167.012	155.029	19.5145	2.39889
	219.029	48.7		109.514	167.183	156.282	19.5899	2.549
	219.373	47.226		109.686	167.521	157.517	19.7389	2.69695
	219.716	47.128		109.858	166.846	158.911	19.4414	2.86395
	220.06	47.969		110.03	162.433	159.948	17.4959	2.98818
	220.404	49.748		110.202	160.29	157.602	16.5512	2.70713
	220.748	49.752		110.374	158.385	155.685	15.7114	2.47747
	221.092	47.212		110.546	155.79	152.823	14.5674	2.13461
	221.436	50.556		110.718	154.894	151.943	14.1724	2.02918
	221.779	48.625		110.89	153.608	151.046	13.6054	1.92172
	222.123	49.334		111.062	153.181	150.247	13.4172	1.826
	222.467	46.969		111.234	153.617	151.054	13.6094	1.92268
	222.811	45.13		111.405	153.536	151.026	13.5737	1.91932
	223.155	45.404		111.577	154.197	153.056	13.8651	2.16252
	223.499	47.332		111.749	155.636	155.057	14.4995	2.40224
	223.842	48.051		111.921	157.839	155.289	15.4706	2.43003
	224.186	47.16		112.093	159.616	155.467	16.254	2.45136
	224.53	48.911		112.265	159.715	153.695	16.2977	2.23907
	224.874	49.987		112.437	158.833	153.713	15.9089	2.24123
	225.218	48.91		112.609	156.687	151.996	14.9628	2.03553
	225.562	46.462		112.781	155.655	150.924	14.5078	1.9071
	225.906	45.665		112.953	156.125	151.814	14.715	2.01373
	226.249	43.774		113.125	156.001	152.593	14.6604	2.10705
	226.593	47.831		113.297	155.583	154.195	14.4761	2.29897
	226.937	49.397		113.469	156.383	153.891	14.8288	2.26255
	227.281	45.746		113.64	155.917	154.779	14.6233	2.36894
	227.625	44.065		113.812	154.975	152.683	14.2081	2.11783
	227.969	44.867		113.984	157.491	152.557	15.3172	2.10274
	228.312	45.779		114.156	157.378	153.523	15.2674	2.21847
	228.656	47.26		114.328	158.924	152.785	15.949	2.13005
	229	45.171		114.5	160.808	151.898	16.7795	2.02379
	229.344	43.946		114.672	163.425	152.239	17.9332	2.06464
	229.688	45.448		114.844	164.282	152.867	18.311	2.13988
	230.032	44.783		115.016	165.434	152.468	18.8189	2.09208
	230.376	46.189		115.188	167.618	153.108	19.7817	2.16875
	230.719	47.297		115.36	168.995	154.164	20.3887	2.29526
	231.063	47.167		115.532	170.905	154.696	21.2308	2.35899
	231.407	46.556		115.704	174.155	154.847	22.6635	2.37708
	231.751	46.799		115.875	174.085	154.137	22.6327	2.29202
	232.095	46.219		116.047	172.529	154.26	21.9467	2.30676
	232.439	46.404		116.219	169.304	155.854	20.525	2.49772
	232.782	46.406		116.391	164.237	155.648	18.2912	2.47304
	233.126	44.454		116.563	160.751	154.905	16.7544	2.38403
	233.47	45.563		116.735	159.741	153.699	16.3091	2.23955
	233.814	46.714		116.907	159.442	153.023	16.1773	2.15857
	234.158	44.354		117.079	157.669	154.032	15.3957	2.27944
	234.502	43.588		117.251	158.947	153.081	15.9591	2.16551
	234.846	41.846		117.423	159.413	152.514	16.1645	2.09759
	235.189	43.297		117.595	158.398	152.047	15.7171	2.04164
	235.533	44.184		117.767	155.909	152.658	14.6198	2.11484
	235.877	45.956		117.939	155.396	152.673	14.3937	2.11664
	236.221	43.756		118.11	156.232	153.036	14.7622	2.16012
	236.565	43.164		118.282	157.079	153.387	15.1356	2.20217
	236.909	45.436		118.454	156.932	154.691	15.0708	2.35839
	237.252	43.583		118.626	156.891	153.104	15.0527	2.16827
	237.596	45.734		118.798	156.171	153.111	14.7353	2.16911
	237.94	44.854		118.97	155.932	153.225	14.63	2.18277
	238.284	44.416		119.142	154.183	153.239	13.8589	2.18444
	238.628	42.333		119.314	155.119	153.537	14.2715	2.22014
	238.972	44.16		119.486	156.108	154.237	14.7075	2.304
	239.315	42.88		119.658	157.032	152.705	15.1149	2.12047
	239.659	43.391		119.83	157.991	152.527	15.5377	2.09914
	240.003	41.854		120.002	157.968	154.199	15.5275	2.29945
	240.347	41.857		120.174	158.214	154.03	15.636	2.2792
	240.691	42.515		120.345	158.276	153.49	15.6633	2.21451
	241.035	43.577		120.517	158.77	152.663	15.8811	2.11544
	241.379	45.714		120.689	161.14	152.859	16.9259	2.13892
	241.722	44.146		120.861	161.103	153.344	16.9096	2.19702
	242.066	42.76		121.033	161.261	153.304	16.9792	2.19223
	242.41	44.343		121.205	162.501	154.732	17.5259	2.3633
	242.754	44.791		121.377	162.501	153.592	17.5259	2.22673
	243.098	46.631		121.549	161.304	154.372	16.9982	2.32018
	243.442	46.39		121.721	158.416	153.759	15.725	2.24674
	243.785	42.261		121.893	157.998	153.555	15.5407	2.2223
	244.129	45.238		122.065	158.056	153.947	15.5663	2.26926
	244.473	43.814		122.237	158.065	153.59	15.5703	2.22649
	244.817	42.392		122.408	157.8	153.221	15.4535	2.18229
	245.161	42.006		122.58	159.113	152.444	16.0323	2.0892
	245.505	42.011		122.752	156.911	151.911	15.0615	2.02535
	245.849	41.264		122.924	155.431	152.422	14.4091	2.08657
	246.192	40.734		123.096	155.032	150.805	14.2332	1.89285
	246.536	41.423		123.268	155.119	150.634	14.2715	1.87236
	246.88	41.616		123.44	156.351	151.344	14.8147	1.95742
	247.224	40.87		123.612	157.132	149.596	15.159	1.74801
	247.568	40.272		123.784	159.1	149.696	16.0266	1.75999
	247.912	39.011		123.956	157.719	149.908	15.4177	1.78539
	248.255	38.884		124.128	157.042	151.182	15.1193	1.93801
	248.599	40.657		124.3	156.398	149.819	14.8354	1.77472
	248.943	42.087		124.472	156.099	149.918	14.7036	1.78658
	249.287	40.706		124.643	154.914	150.611	14.1812	1.86961
	249.631	40.752		124.815	155.058	149.558	14.2447	1.74346
	249.975	42.166		124.987	154.824	148.943	14.1415	1.66978
	250.318	40.871		125.159	155.042	148.832	14.2376	1.65648
	250.662	40.481		125.331	154.884	149.658	14.1679	1.75544
	251.006	41.368		125.503	155.785	150.178	14.5651	1.81773
	251.35	40.722		125.675	156.625	151.098	14.9355	1.92795
	251.694	41.662		125.847	156.423	150.737	14.8464	1.8847
	252.038	41.963		126.019	156.28	152.191	14.7834	2.05889
	252.382	41.826		126.191	156.146	151.761	14.7243	2.00738
	252.725	42.883		126.363	157.059	153.011	15.1268	2.15713
	253.069	43.426		126.535	159.706	152.347	16.2937	2.07758
	253.413	42.372		126.707	159.588	152.719	16.2417	2.12215
	253.757	41.427		126.878	158.601	153.794	15.8066	2.25093
	254.101	43.58		127.05	159.058	153.248	16.008	2.18552
	254.445	44.913		127.222	160.051	153.374	16.4458	2.20062
	254.788	46.081		127.394	159.212	151.636	16.0759	1.9924
	255.132	46.716		127.566	161.387	151.621	17.0348	1.99061
	255.476	47.855		127.738	164.193	151.002	18.2718	1.91645
	255.82	48.146		127.91	165.161	151.097	18.6985	1.92783
	256.164	48.302		128.082	165.446	150.259	18.8242	1.82744
	256.508	47.582		128.254	166.333	151.201	19.2152	1.94029
	256.852	46.497		128.426	165.977	149.966	19.0583	1.79234
	257.195	45.167		128.598	162.717	151.123	17.6211	1.93094
	257.539	46.99		128.77	161.456	149.331	17.0652	1.71626
	257.883	47.254		128.942	160.836	149.784	16.7919	1.77053
	258.227	46.723		129.113	160.31	149.44	16.56	1.72932
	258.571	44.747		129.285	159.811	148.744	16.34	1.64594
	258.915	43.971		129.457	158.611	148.273	15.811	1.58951
	259.258	44.684		129.629	157.627	148.617	15.3772	1.63072
	259.602	43.464		129.801	156.409	148.912	14.8402	1.66607
	259.946	43.031		129.973	156.481	147.955	14.872	1.55142
	260.29	43.752		130.145	158.124	148.036	15.5963	1.56112
	260.634	40.577		130.317	158.627	150.503	15.818	1.85667
	260.978	41.168		130.489	159.668	149.189	16.277	1.69925
	261.321	43.007		130.661	162.417	150.077	17.4888	1.80563
	261.665	39.966		130.833	161.654	150.656	17.1525	1.875
	262.009	40.069		131.005	162.374	150.357	17.4699	1.83918
	262.353	41.482		131.177	163.861	150.155	18.1254	1.81498
	262.697	42.487		131.348	164.233	150.816	18.2894	1.89417
	263.041	42.062		131.52	167.776	150.011	19.8513	1.79773
	263.385	40.826		131.692	170.085	149.239	20.8693	1.70524
	263.728	41.064		131.864	171.926	150.908	21.6809	1.90519
	264.072	39.603		132.036	172.478	150.487	21.9242	1.85475
	264.416	41.126		132.208	172.634	152.054	21.993	2.04248
	264.76	38.205		132.38	169.377	151.972	20.5571	2.03266
	265.104	37.929		132.552	167.463	149.203	19.7134	1.70093
	265.448	39.031		132.724	166.098	149.464	19.1116	1.7322
	265.791	38.844		132.896	167.648	150.044	19.7949	1.80168
	266.135	38.232		133.068	168.514	151.849	20.1767	2.01792
	266.479	38.973		133.24	171.903	151.879	21.6707	2.02151
	266.823	40.414		133.411	171.879	150.157	21.6601	1.81522
	267.167	41.156		133.583	171.014	150.559	21.2788	1.86338
	267.511	41.916		133.755	168.785	150.955	20.2962	1.91082
	267.855	40.256		133.927	165.909	150.019	19.0283	1.79868
	268.198	39.487		134.099	163.759	149.569	18.0805	1.74477
	268.542	39.431		134.271	163.937	151.058	18.1589	1.92316
	268.886	40.047		134.443	164.242	152.61	18.2934	2.10909
	269.23	40.887		134.615	165.701	153.813	18.9366	2.25321
	269.574	41.363		134.787	166.385	153.665	19.2381	2.23548
	269.918	41.166		134.959	169.378	154.619	20.5576	2.34977
	270.261	42.375		135.131	166.819	154.416	19.4295	2.32545
	270.605	43.902		135.303	170.381	155.83	20.9998	2.49485
	270.949	42.478		135.475	171.721	157.942	21.5905	2.74786
	271.293	43.188		135.646	172.395	158.497	21.8876	2.81435
	271.637	43.463		135.818	169.891	157.229	20.7837	2.66245
	271.981	40.489		135.99	167.67	154.395	19.8046	2.32293
	272.325	40.624		136.162	166.514	152.798	19.295	2.13161
	272.668	39.243		136.334	167.368	152.129	19.6715	2.05146
	273.012	39.083		136.506	169.115	150.727	20.4416	1.8835
	273.356	40.602		136.678	172.072	151.174	21.7452	1.93705
	273.7	39.009		136.85	173.427	150.735	22.3426	1.88446
	274.044	37.857		137.022	171.881	150.035	21.661	1.8006
	274.388	37.845		137.194	168.183	150.911	20.0308	1.90555
	274.731	38.666		137.366	167.021	150.387	19.5185	1.84277
	275.075	39.818		137.538	168.941	149.211	20.3649	1.70189
	275.419	40.307		137.71	170.591	149.961	21.0923	1.79174
	275.763	39.439		137.881	170.292	151.554	20.9605	1.98258
	276.107	39.699		138.053	171.046	152.808	21.2929	2.13281
	276.451	39.045		138.225	170.583	151.541	21.0888	1.98102
	276.794	39.2		138.397	170.036	151.343	20.8477	1.9573
	277.138	38.845		138.569	169.223	152.248	20.4893	2.06572
	277.482	39.074		138.741	167.61	151.969	19.7782	2.0323
	277.826	41.079		138.913	167.453	152.097	19.709	2.04763
	278.17	40.008		139.085	167.754	152.133	19.8416	2.05194
	278.514	36.667		139.257	167.73	151.395	19.8311	1.96353
	278.858	37.815		139.429	166.068	152.321	19.0984	2.07447
	279.201	37.006		139.601	166.858	152.47	19.4466	2.09232
	279.545	38.552		139.773	168.065	153.112	19.9788	2.16923
	279.889	38.078		139.945	167.932	153.439	19.9201	2.2084
	280.233	39.556		140.116	170.042	154.724	20.8503	2.36235
	280.577	37.074		140.288	174.389	153.816	22.7667	2.25357
	280.921	35.931		140.46	175.781	154.964	23.3803	2.3911
	281.264	36.038		140.632	175.369	153.367	23.1987	2.19978
	281.608	35.426		140.804	175.664	153.95	23.3287	2.26962
	281.952	35.257		140.976	177.912	154.152	24.3198	2.29382
	282.296	36.264		141.148	178.987	152.979	24.7937	2.15329
	282.64	36.209		141.32	178.679	153.605	24.6579	2.22829
	282.984	35.325		141.492	175.197	153.085	23.1229	2.16599
	283.328	36.035		141.664	176.404	150.697	23.655	1.87991
	283.671	37.178		141.836	174.457	150.594	22.7966	1.86757
	284.015	36.126		142.008	172.043	152.003	21.7324	2.03637
	284.359	35.715		142.18	171.65	151.9	21.5592	2.02403
	284.703	34.449		142.351	169.463	152.258	20.5951	2.06692
	285.047	35.453		142.523	167.817	152.716	19.8694	2.12179
	285.391	36.637		142.695	167.638	154.17	19.7905	2.29598
	285.734	35.326		142.867	167.877	153.436	19.8959	2.20804
	286.078	33.52		143.039	170.707	154.817	21.1435	2.37349
	286.422	35.324		143.211	172.109	154.026	21.7615	2.27873
	286.766	35.868		143.383	168.646	153.711	20.2349	2.24099
	287.11	34.664		143.555	167.051	153.107	19.5317	2.16863
	287.454	33.088		143.727	167.408	152.727	19.6891	2.1231
	287.797	34.23		143.899	168.813	152.003	20.3085	2.03637
	288.141	36.862		144.071	170.703	151.519	21.1417	1.97839
	288.485	35.536		144.243	172.22	151.824	21.8105	2.01492
	288.829	34.254		144.415	172.819	151.694	22.0745	1.99935
	289.173	35.476		144.586	173.319	151.48	22.295	1.97371
	289.517	34.156		144.758	173.618	151.635	22.4268	1.99228
	289.861	34.021		144.93	172.929	151.998	22.123	2.03577
	290.204	33.195		145.102	173.721	153.645	22.4722	2.23308
	290.548	33.262		145.274	170.581	151.911	21.0879	2.02535
	290.892	33.093		145.446	170.385	151.125	21.0015	1.93118
	291.236	33.177		145.618	174.067	152.524	22.6247	2.09879
	291.58	31.444		145.79	176.501	152.957	23.6977	2.15066
	291.924	31.451		145.962	175.634	152.701	23.3155	2.11999
	292.267	31.959		146.134	174.669	151.269	22.8901	1.94844
	292.611	33.358		146.306	171.431	151.466	21.4626	1.97204
	292.955	33.033		146.478	171.403	151.201	21.4503	1.94029
	293.299	34.268		146.649	169.654	152.009	20.6793	2.03709
	293.643	33.292		146.821	167.737	151.863	19.8342	2.0196
	293.987	33.392		146.993	165.777	150.945	18.9701	1.90962
	294.331	34.54		147.165	164.104	150.161	18.2326	1.8157
	294.674	33.944		147.337	164.293	150.171	18.3159	1.81689
	295.018	33.099		147.509	165.709	150.028	18.9401	1.79976
	295.362	32.211		147.681	165.897	149.198	19.023	1.70033
	295.706	30.109		147.853	166.705	149.09	19.3792	1.68739
	296.05	30.513		148.025	168.63	148.985	20.2278	1.67481
	296.394	29.909		148.197	171.256	149.302	21.3855	1.71279
	296.737	30.833		148.369	171.126	149.172	21.3282	1.69721
	297.081	31.69		148.541	171.703	148.918	21.5826	1.66678
	297.425	31.063		148.713	175.551	149.954	23.2789	1.7909
	297.769	30.985		148.884	177.358	150.398	24.0755	1.84409
	298.113	29.56		149.056	179.791	148.881	25.1481	1.66235
	298.457	32.335		149.228	177.754	149.519	24.2501	1.73878
	298.8	31.846		149.4	180.076	151.098	25.2738	1.92795
	299.144	29.584		149.572	181.626	151.633	25.9571	1.99204
	299.488	30.922		149.744	183.763	151.832	26.8992	2.01588
	299.832	31.751		149.916	185.388	152.007	27.6155	2.03685
	300.176	32.071		150.088	185.38	153.864	27.612	2.25932
	300.52	30.305		150.26	186.042	152.522	27.9039	2.09855
	300.864	27.836		150.432	184.953	152.14	27.4238	2.05278
	301.207	27.802		150.604	183.009	151.995	26.5668	2.03541
	301.551	28.652		150.776	181.896	150.256	26.0761	1.82708
	301.895	28.168		150.948	179.708	149.926	25.1115	1.78754
	302.239	29.113		151.119	180.489	151.064	25.4558	1.92388
	302.583	30.201		151.291	180.249	149.584	25.35	1.74657
	302.927	29.85		151.463	180.799	149.854	25.5925	1.77892
	303.27	28.591		151.635	182.944	151.621	26.5381	1.99061
	303.614	28.313		151.807	183.011	152.467	26.5677	2.09196
	303.958	29.206		151.979	181.29	151.441	25.809	1.96904
	304.302	28.96		152.151	181.934	152.719	26.0929	2.12215
	304.646	28.445		152.323	186.953	154.996	28.3055	2.39493
	304.99	27.292		152.495	190.275	154.452	29.77	2.32976
	305.334	27.74		152.667	194.531	154.073	31.6462	2.28436
	305.677	28.847		152.839	194.185	153.929	31.4937	2.2671
	306.021	27.457		153.011	193.743	154.371	31.2988	2.32006
	306.365	26.718		153.183	195.407	154.233	32.0324	2.30352
	306.709	26.218		153.354	198.403	153.495	33.3532	2.21511
	307.053	26.341		153.526	198.318	154.007	33.3157	2.27645
	307.397	26.29		153.698	197.822	154.255	33.097	2.30616
	307.74	26.403		153.87	197.232	153.858	32.8369	2.2586
	308.084	26.675		154.042	197.908	153.321	33.135	2.19427
	308.428	27.454		154.214	202.131	151.965	34.9966	2.03182
	308.772	26.123		154.386	204.644	153.234	36.1045	2.18384
	309.116	28.321		154.558	205.715	152.337	36.5766	2.07638
	309.46	26.036		154.73	203.901	151.688	35.7769	1.99863
	309.804	26.446		154.902	200.653	152.134	34.3451	2.05206
	310.147	26.116		155.074	198.673	153.61	33.4722	2.22889
	310.491	25.911		155.246	192.989	151.423	30.9664	1.96688
	310.835	26.182		155.418	187.112	152.372	28.3756	2.08058
	311.179	25.358		155.589	183.732	151.569	26.8855	1.98438
	311.523	25.15		155.761	183.142	151.845	26.6254	2.01744
	311.867	26.241		155.933	184.889	153.037	27.3956	2.16024
	312.21	25.425		156.105	183.099	151.212	26.6064	1.94161
				156.277	180.368	150.979	25.4025	1.91369
				156.449	180.133	150.671	25.2989	1.87679
				156.621	181.618	152.48	25.9536	2.09351
				156.793	184.087	152.668	27.042	2.11604
				156.965	189.017	154.879	29.2154	2.38092
				157.137	193.22	153.535	31.0683	2.2199
				157.309	201.179	153.511	34.577	2.21703
				157.481	206.034	155.102	36.7173	2.40763
				157.653	202.728	153.916	35.2598	2.26555
				157.824	197.663	154.022	33.0269	2.27825
				157.996	195.77	154.635	32.1924	2.35168
				158.168	190.896	154.553	30.0437	2.34186
				158.34	188.01	154.991	28.7714	2.39433
				158.512	188.17	155.681	28.842	2.477
				158.684	189.58	156.845	29.4636	2.61644
				158.856	193.964	157.404	31.3963	2.68341
				159.028	200.471	157.65	34.2648	2.71288
				159.2	204.038	160.036	35.8373	2.99873
				159.372	203.36	158.985	35.5385	2.87282
				159.544	202.18	157.972	35.0183	2.75146
				159.716	202.356	157.734	35.0958	2.72295
				159.887	203.233	158.859	35.4825	2.85772
				160.059	200.762	158.332	34.3931	2.79459
				160.231	198.552	157.276	33.4189	2.66808
				160.403	199.306	156.743	33.7513	2.60422
				160.575	201.296	156.471	34.6285	2.57164
				160.747	201.563	155.449	34.7462	2.4492
				160.919	197.702	156.08	33.0441	2.5248
				161.091	194.156	156.691	31.4809	2.59799
				161.263	192.73	157.022	30.8522	2.63765
				161.435	196.017	157.231	32.3013	2.66269
				161.607	200.22	156.65	34.1542	2.59308
				161.779	196.457	156.705	32.4953	2.59967
				161.951	193.782	158.494	31.316	2.81399
				162.122	194.075	159.205	31.4452	2.89917
				162.294	194.146	157.712	31.4765	2.72031
				162.466	192.387	156.495	30.701	2.57451
				162.638	193.207	156.421	31.0625	2.56565
				162.81	195.275	154.855	31.9742	2.37804
				162.982	199.447	154.228	33.8134	2.30293
				163.154	202.963	152.912	35.3634	2.14527
				163.326	196.689	153.603	32.5976	2.22805
				163.498	195.018	153.929	31.8609	2.2671
				163.67	196.461	154.81	32.497	2.37265
				163.842	199.652	154.386	33.9038	2.32185
				164.014	200.741	154.814	34.3839	2.37313
				164.186	199.206	155.764	33.7072	2.48694
				164.357	193.067	157.191	31.0008	2.65789
				164.529	186.743	155.441	28.2129	2.44824
				164.701	185.709	152.883	27.7571	2.14179
				164.873	187.556	152.755	28.5713	2.12646
				165.045	192.13	152.539	30.5877	2.10058
				165.217	192.326	152.478	30.6741	2.09327
				165.389	189.455	152.021	29.4085	2.03853
				165.561	186.995	153.135	28.324	2.17198
				165.733	182.457	153.773	26.3234	2.24842
				165.905	181.035	154.239	25.6965	2.30424
				166.077	179.109	153.392	24.8475	2.20277
				166.249	179.377	155.178	24.9656	2.41674
				166.421	183.006	155.615	26.5654	2.46909
				166.592	184.091	153.861	27.0438	2.25896
				166.764	186.113	154.358	27.9352	2.3185
				166.936	189.762	155.007	29.5438	2.39625
				167.108	192.484	154.68	30.7438	2.35707
				167.28	193.695	155.545	31.2777	2.4607
				167.452	196.93	155.682	32.7038	2.47712
				167.624	194.413	156.682	31.5942	2.59692
				167.796	189.374	155.449	29.3728	2.4492
				167.968	187.134	154.025	28.3853	2.27861
				168.14	188.307	153.705	28.9024	2.24027
				168.312	191.815	153.038	30.4489	2.16036
				168.484	195.517	152.833	32.0809	2.1358
				168.656	201.926	152.664	34.9063	2.11556
				168.827	203.719	151.731	35.6967	2.00378
				168.999	208.575	151.753	37.8375	2.00642
				169.171	214.081	151.351	40.2648	1.95826
				169.343	211.694	150.771	39.2125	1.88877
				169.515	210.182	152.815	38.5459	2.13365
				169.687	209.018	153.183	38.0328	2.17773
				169.859	208.924	153.259	37.9913	2.18684
				170.031	207.126	153.392	37.1987	2.20277
				170.203	206.061	153.191	36.7292	2.17869
				170.375	211.227	155.093	39.0066	2.40655
				170.547	210.31	154.323	38.6023	2.31431
				170.719	206.362	154.41	36.8619	2.32473
				170.891	203.488	154.706	35.5949	2.36019
				171.062	199.647	156.41	33.9016	2.56433
				171.234	201.305	156.077	34.6325	2.52444
				171.406	198.617	155.642	33.4475	2.47232
				171.578	197.028	153.697	32.747	2.23931
				171.75	195.841	152.52	32.2237	2.09831
				171.922	199.347	152.993	33.7693	2.15497
				172.094	205.207	153.076	36.3527	2.16491
				172.266	211.382	152.919	39.0749	2.14611
				172.438	212.8	154.257	39.7	2.3064
				172.61	210.488	152.649	38.6808	2.11376
				172.782	208.076	152.807	37.6175	2.13269
				172.954	206.814	154.256	37.0611	2.30628
				173.125	206.288	153.61	36.8293	2.22889
				173.297	209.544	153.592	38.2646	2.22673
				173.469	208.674	154.977	37.8811	2.39266
				173.641	205.65	154.808	36.548	2.37241
				173.813	205.702	154.399	36.5709	2.32341
				173.985	206.459	154.776	36.9046	2.36858
				174.157	201.92	153.942	34.9036	2.26866
				174.329	199.821	153.975	33.9783	2.27262
				174.501	203.063	152.336	35.4075	2.07626
				174.673	208.688	153.43	37.8873	2.20732
				174.845	212.999	153.261	39.7878	2.18708
				175.017	219.737	152.77	42.7582	2.12826
				175.189	221.865	152.699	43.6963	2.11975
				175.36	217.436	151.409	41.7438	1.96521
				175.532	216.902	152.101	41.5084	2.04811
				175.704	220.87	151.535	43.2577	1.9803
				175.876	221.127	151.33	43.371	1.95574
				176.048	218.834	151.711	42.3601	2.00139
				176.22	216.217	152.17	41.2064	2.05638
				176.392	216.262	151.501	41.2263	1.97623
				176.564	216.685	151.529	41.4127	1.97958
				176.736	220.179	151.963	42.9531	2.03158
				176.908	223.671	150.818	44.4925	1.89441
				177.08	229.999	151.549	47.2822	1.98198
				177.252	233.213	152.049	48.6991	2.04188
				177.424	234.551	153.994	49.2889	2.27489
				177.595	237.677	153.661	50.667	2.235
				177.767	239.515	153.979	51.4773	2.27309
				177.939	236.569	153.44	50.1785	2.20852
				178.111	232.854	154.637	48.5408	2.35192
				178.283	232.21	154.507	48.2569	2.33635
				178.455	230.414	154.952	47.4651	2.38966
				178.627	227.639	154.686	46.2418	2.35779
				178.799	228.573	154.59	46.6535	2.34629
				178.971	230.494	157.061	47.5004	2.64232
				179.143	235.222	157.756	49.5847	2.72558
				179.315	232.933	158.587	48.5756	2.82514
				179.487	232.355	156.728	48.3208	2.60243
				179.659	232.552	158.185	48.4077	2.77698
				179.83	236.782	158.011	50.2724	2.75613
				180.002	245.7	158.568	54.2039	2.82286
				180.174	250.252	155.678	56.2107	2.47664
				180.346	248.934	155.287	55.6296	2.42979
				180.518	243.813	155.589	53.372	2.46597
				180.69	244.283	154.154	53.5792	2.29406
				180.862	242.203	154.798	52.6623	2.37121
				181.034	241.248	155.512	52.2413	2.45675
				181.206	242.526	156.338	52.8047	2.5557
				181.378	239.03	155.52	51.2635	2.45771
				181.55	235.309	155.527	49.6231	2.45855
				181.722	233.309	155.9	48.7414	2.50323
				181.894	231.816	155.388	48.0832	2.44189
				182.065	226.206	156.384	45.61	2.56122
				182.237	224.089	156.232	44.6768	2.54301
				182.409	223.251	155.92	44.3073	2.50563
				182.581	224.309	154.652	44.7738	2.35372
				182.753	219.406	153.97	42.6123	2.27202
				182.925	218.003	155.099	41.9938	2.40727
				183.097	214.898	154.474	40.6249	2.3324
				183.269	214.907	154.777	40.6289	2.3687
				183.441	216.027	154.7	41.1227	2.35947
				183.613	215.366	153.816	40.8313	2.25357
				183.785	216.726	155.325	41.4308	2.43435
				183.957	220.056	154.533	42.8988	2.33946
				184.128	216.438	154.286	41.3038	2.30987
				184.3	215.298	153.095	40.8013	2.16719
				184.472	214.651	155.487	40.5161	2.45375
				184.644	214.22	155.702	40.3261	2.47951
				184.816	215.208	153.722	40.7616	2.24231
				184.988	213.602	154.505	40.0536	2.33611
				185.16	215.587	154.653	40.9287	2.35384
				185.332	216.04	156.056	41.1284	2.52192
				185.504	214.595	155.1	40.4914	2.40739
				185.676	215.67	153.362	40.9653	2.19918
				185.848	218.148	153.052	42.0577	2.16204
				186.02	217.165	153.657	41.6243	2.23452
				186.192	215.927	154.626	41.0786	2.35061
				186.363	211.514	154.378	39.1331	2.3209
				186.535	209.173	154.575	38.1011	2.3445
				186.707	205.291	154.102	36.3897	2.28783
				186.879	203.286	153.964	35.5058	2.2713
				187.051	203.893	153.762	35.7734	2.2471
				187.223	205.755	156.063	36.5943	2.52276
				187.395	203.364	157	35.5402	2.63501
				187.567	202.292	157.739	35.0676	2.72354
				187.739	205.869	157.765	36.6445	2.72666
				187.911	208.614	156.656	37.8547	2.5938
				188.083	209.747	155.022	38.3541	2.39805
				188.255	213.299	154.045	39.92	2.281
				188.427	222.105	152.637	43.8021	2.11232
				188.598	226.906	153.571	45.9186	2.22422
				188.77	232.044	150.909	48.1837	1.90531
				188.942	238.723	150.524	51.1281	1.85918
				189.114	243.999	150.618	53.454	1.87045
				189.286	244.645	151.396	53.7388	1.96365
				189.458	242.468	151.827	52.7791	2.01528
				189.63	232.821	151.236	48.5262	1.94448
				189.802	224.415	150.72	44.8205	1.88266
				189.974	223.454	151.114	44.3968	1.92987
				190.146	227.576	151.279	46.214	1.94963
				190.318	230.373	151.485	47.4471	1.97431
				190.49	232.377	151.533	48.3305	1.98006
				190.662	235.552	152.577	49.7302	2.10513
				190.833	239.417	154.149	51.4341	2.29346
				191.005	245.986	153.514	54.33	2.21739
				191.177	247.2	155.086	54.8652	2.40571
				191.349	248.652	154.152	55.5053	2.29382
				191.521	248.666	155.617	55.5115	2.46933
				191.693	247.703	155.825	55.0869	2.49425
				191.865	247.804	155.792	55.1315	2.49029
				192.037	248.473	156.804	55.4264	2.61153
				192.209	244.235	156.953	53.5581	2.62938
				192.381	237.626	156.272	50.6445	2.5478
				192.553	236.835	157.099	50.2958	2.64687
				192.725	239.181	158.377	51.33	2.79998
				192.897	243.648	157.863	53.2993	2.7384
				193.068	250.409	157.106	56.2799	2.64771
				193.24	245.787	155.803	54.2423	2.49161
				193.412	237.611	154.998	50.6379	2.39517
				193.584	230.279	154.669	47.4056	2.35576
				193.756	229.268	153.08	46.9599	2.16539
				193.928	233.871	153.466	48.9891	2.21164
				194.1	236.79	155.759	50.276	2.48634
				194.272	238.641	154.576	51.092	2.34462
				194.444	241.713	153.704	52.4463	2.24015
				194.616	246.71	155.09	54.6492	2.40619
				194.788	254.42	155.954	58.0481	2.5097
				194.96	257.511	155.495	59.4108	2.45471
				195.132	256.687	154.008	59.0475	2.27657
				195.303	252.224	155.715	57.08	2.48107
				195.475	252.574	155.396	57.2343	2.44285
				195.647	255.004	154.713	58.3056	2.36103
				195.819	255.074	156.036	58.3364	2.51952
				195.991	253.257	156.588	57.5354	2.58565
				196.163	256.387	156.17	58.9153	2.53558
				196.335	259.411	156.906	60.2484	2.62375
				196.507	255.564	157.295	58.5524	2.67035
				196.679	248.879	156.18	55.6054	2.53678
				196.851	246.146	156.345	54.4005	2.55654
				197.023	247.425	156.357	54.9644	2.55798
				197.195	246.672	157.697	54.6324	2.71851
				197.367	250.875	158.192	56.4853	2.77781
				197.538	255.237	159.068	58.4083	2.88276
				197.71	254.533	158.548	58.0979	2.82046
				197.882	255.548	159.595	58.5454	2.94589
				198.054	254.529	160.73	58.0962	3.08187
				198.226	256.519	160.239	58.9734	3.02305
				198.398	258.414	158.722	59.8088	2.84131
				198.57	259.554	159.009	60.3114	2.87569
				198.742	261.305	160.198	61.0833	3.01813
				198.914	263.788	160.544	62.178	3.05959
				199.086	262.376	161.487	61.5555	3.17256
				199.258	268.6	161.071	64.2993	3.12272
				199.43	274.415	160.356	66.8628	3.03706
				199.601	278.743	160.251	68.7708	3.02448
				199.773	278.716	161.888	68.7589	3.2206
				199.945	275.47	162.427	67.3279	3.28517
				200.117	271.185	163.992	65.4389	3.47266
				200.289	270.378	164.214	65.0831	3.49925
				200.461	273.248	163.822	66.3484	3.45229
				200.633	268.316	162.431	64.1741	3.28565
				200.805	263.353	162.756	61.9862	3.32458
				200.977	258.635	164.03	59.9063	3.47721
				201.149	257.346	163.407	59.338	3.40257
				201.321	258.094	164.142	59.6678	3.49063
				201.493	259.82	164.816	60.4287	3.57137
				201.665	261.251	165.753	61.0595	3.68363
				201.836	264.341	166.651	62.4217	3.79121
				202.008	269.481	165.586	64.6877	3.66362
				202.18	280.655	166.952	69.6137	3.82727
				202.352	279.713	167.632	69.1985	3.90873
				202.524	273.039	167.502	66.2562	3.89316
				202.696	269.232	167.803	64.5779	3.92922
				202.868	266.957	166.972	63.575	3.82966
				203.04	266.977	165.468	63.5838	3.64948
				203.212	269.654	166.646	64.764	3.79061
				203.384	270.525	166.137	65.1479	3.72963
				203.556	266.694	166.421	63.4591	3.76365
				203.728	262.076	167.216	61.4232	3.85889
				203.9	263.915	167.355	62.2339	3.87555
				204.071	264.002	167.981	62.2723	3.95054
				204.243	263.731	169.786	62.1528	4.16678
				204.415	264.641	173.894	62.554	4.65892
				204.587	265.44	176.075	62.9062	4.92021
				204.759	263.421	178.172	62.0162	5.17143
				204.931	268.602	180.607	64.3002	5.46314
				205.103	277.015	182	68.009	5.63002
				205.275	288.761	186.039	73.1872	6.1139
				205.447	300.518	187.392	78.3703	6.27599
				205.619	301.734	187.636	78.9063	6.30522
				205.791	296.286	188.836	76.5046	6.44898
				205.963	291.305	193.579	74.3088	7.01719
				206.135	287.061	197.819	72.4378	7.52515
				206.306	282.705	201.608	70.5175	7.97907
				206.478	284.772	203.176	71.4287	8.16692
				206.65	289.557	205.164	73.5382	8.40508
				206.822	292.893	201.217	75.0088	7.93223
				206.994	292.432	197.357	74.8056	7.4698
				207.166	293.91	194.874	75.4572	7.17234
				207.338	287.669	195.24	72.7058	7.21618
				207.51	279.197	195.602	68.971	7.25955
				207.682	273.302	193.308	66.3722	6.98473
				207.854	269.392	191.572	64.6485	6.77676
				208.026	274.511	194.785	66.9052	7.16167
				208.198	278	194.354	68.4433	7.11004
				208.37	284.351	194.03	71.2431	7.07122
				208.541	281.814	193.983	70.1247	7.06559
				208.713	281.031	194.633	69.7795	7.14346
				208.885	280.981	194.327	69.7574	7.10681
				209.057	279.14	195.335	68.9458	7.22756
				209.229	273.421	195.016	66.4246	7.18935
				209.401	273.319	194.669	66.3797	7.14778
				209.573	270.594	195.565	65.1784	7.25512
				209.745	272.854	199.01	66.1747	7.66783
				209.917	273.977	202.207	66.6698	8.05083
				210.089	271.655	202.266	65.6461	8.0579
				210.261	273.214	201.314	66.3334	7.94385
				210.433	279.197	200.818	68.971	7.88443
				210.604	279.626	203.763	69.1601	8.23724
				210.776	280.733	208.138	69.6481	8.76137
				210.948	289.69	209.355	73.5968	8.90717
				211.12	297.868	210.787	77.202	9.07872
				211.292	309.623	213.609	82.3842	9.4168
				211.464	322.677	214.729	88.139	9.55098
				211.636	333.193	218.245	92.775	9.97219
				211.808	331.182	221.995	91.8884	10.4214
				211.98	323.617	226.12	88.5534	10.9156
				212.152	320.444	231.426	87.1546	11.5513
				212.324	320.645	239.408	87.2432	12.5075
				212.496	314.833	246.535	84.681	13.3614
				212.668	310.843	260.746	82.922	15.0638
				212.839	307.746	273.262	81.5567	16.5633
				213.011	312.383	284.126	83.6009	17.8648
				213.183	318.053	293.025	86.1005	18.9309
				213.355	316.307	303.761	85.3308	20.2171
				213.527	310.209	322.466	82.6425	22.4579
				213.699	311.823	353.156	83.3541	26.1346
				213.871	316.887	396.206	85.5865	31.292
				214.043	320.991	456.104	87.3957	38.4678
				214.215	315.913	521.186	85.1571	46.2647
				214.387	313.501	590.775	84.0938	54.6015
				214.559	317.092	650.753	85.6769	61.7869
				214.731	323.319	705.893	88.422	68.3927
				214.903	335.887	756.965	93.9626	74.5111
				215.074	346.026	803.898	98.4323	80.1337
				215.246	349.582	847.885	100	85.4034
				215.418	345.332	885.784	98.1264	89.9437
				215.59	331.322	925.1	91.9501	94.6538
				215.762	319.827	947.901	86.8826	97.3854
				215.934	311.973	961.093	83.4202	98.9658
				216.106	311.077	969.726	83.0252	100
				216.278	312.889	965.326	83.824	99.4729
				216.45	317.179	957.687	85.7152	98.5577
				216.622	317.8	952.323	85.989	97.9151
				216.794	321.144	943.129	87.4632	96.8137
				216.966	317.003	906.951	85.6376	92.4795
				217.138	313.403	868.01	84.0506	87.8144
				217.309	309.167	825.692	82.1832	82.7447
				217.481	309.025	799.374	82.1206	79.5917
				217.653	306.413	786.859	80.9691	78.0924
				217.825	303.966	780.938	79.8903	77.3831
				217.997	305.488	785.295	80.5613	77.9051
				218.169	309.72	779.413	82.427	77.2004
				218.341	313.496	762.575	84.0916	75.1832
				218.513	307.621	738.207	81.5016	72.2639
				218.685	298.126	709.862	77.3158	68.8682
				218.857	291.992	687.034	74.6116	66.1334
				219.029	290.326	671.38	73.8772	64.258
				219.201	291.797	660.133	74.5256	62.9106
				219.373	292.068	644.025	74.6451	60.9809
				219.544	290.467	621.884	73.9393	58.3284
				219.716	287.065	601.384	72.4396	55.8724
				219.888	275.434	578.193	67.3121	53.0941
				220.06	270.367	557.558	65.0783	50.6221
				220.232	267.665	525.703	63.8871	46.8058
				220.404	262.809	497.824	61.7464	43.4659
				220.576	259.377	478.829	60.2334	41.1903
				220.748	258.731	468.456	59.9486	39.9476
				220.92	256.875	466.015	59.1304	39.6552
				221.092	260.4	465.893	60.6844	39.6406
				221.264	265.907	465.236	63.1121	39.5618
				221.436	278.44	464.88	68.6373	39.5192
				221.607	291.125	462.319	74.2294	39.2124
				221.779	301.524	457.619	78.8138	38.6493
				221.951	306.913	446.993	81.1895	37.3763
				222.123	312.287	437.475	83.5586	36.2361
				222.295	311.5	433.071	83.2117	35.7085
				222.467	304.616	425.441	80.1769	34.7944
				222.639	295.939	417.775	76.3516	33.876
				222.811	294.327	405.567	75.641	32.4135
				222.983	296.203	396.959	76.468	31.3822
				223.155	294.366	384.243	75.6582	29.8588
				223.327	299.677	367.56	77.9995	27.8602
				223.499	305.013	353.777	80.3519	26.209
				223.671	295.323	341.088	76.0801	24.6888
				223.842	271.952	330.905	65.777	23.4689
				224.014	251.421	324.098	56.726	22.6534
				224.186	243.701	318.256	53.3227	21.9536
				224.358	242.553	309.838	52.8166	20.9451
				224.53	238.522	298.838	51.0395	19.6273
				224.702	233.486	290.12	48.8194	18.5829
				224.874	231.629	281.331	48.0008	17.5299
				225.046	229.372	275.431	47.0058	16.8231
				225.218	227.546	268.411	46.2008	15.9821
				225.39	225.881	261.707	45.4668	15.179
				225.562	223.171	259.193	44.2721	14.8778
				225.734	220.695	255.838	43.1805	14.4759
				225.906	214.681	254.395	40.5293	14.303
				226.077	211.299	248.042	39.0383	13.5419
				226.249	205.515	243.347	36.4885	12.9794
				226.421	201.617	241.298	34.7701	12.734
				226.593	202.814	235.175	35.2977	12.0004
				226.765	206.481	233.131	36.9143	11.7555
				226.937	209.049	227.17	38.0464	11.0414
				227.109	210.411	226.271	38.6469	10.9337
				227.281	215.498	222.776	40.8895	10.515
				227.453	214.484	218.412	40.4424	9.9922
				227.625	206.689	215.928	37.006	9.69462
				227.797	196.593	210.5	32.5552	9.04434
				227.969	192.957	204.801	30.9523	8.3616
				228.141	191.53	201.535	30.3232	7.97033
				228.312	189.351	200.599	29.3626	7.85819
				228.484	189.16	201.783	29.2784	8.00004
				228.656	190.413	198.917	29.8308	7.65669
				228.828	190.704	199.067	29.9591	7.67466
				229	191.27	195.741	30.2086	7.2762
				229.172	187.348	193.198	28.4796	6.97155
				229.344	185.459	193.794	27.6468	7.04295
				229.516	182.269	190.794	26.2405	6.68355
				229.688	182.215	189.582	26.2167	6.53835
				229.86	181.689	188.691	25.9849	6.43161
				230.032	180.119	187.695	25.2927	6.31229
				230.204	179.256	186.568	24.9123	6.17727
				230.376	178.102	186.04	24.4035	6.11402
				230.547	180.051	186.196	25.2627	6.13271
				230.719	181.589	186.618	25.9408	6.18326
				230.891	182.254	184.155	26.2339	5.88819
				231.063	182.735	185.208	26.446	6.01434
				231.235	184.268	184.815	27.1218	5.96726
				231.407	188.955	186.702	29.188	6.19333
				231.579	191.714	188.598	30.4043	6.42047
				231.751	191.523	188.991	30.3201	6.46755
				231.923	193.759	190.368	31.3059	6.63252
				232.095	190.636	189.603	29.9291	6.54087
				232.267	183.812	187.822	26.9208	6.3275
				232.439	178.969	187.064	24.7857	6.23669
				232.611	175.512	186.598	23.2617	6.18087
				232.782	174.961	185.614	23.0188	6.06298
				232.954	172.19	186.02	21.7972	6.11162
				233.126	171.43	186.19	21.4622	6.13199
				233.298	171.407	185.145	21.4521	6.0068
				233.47	170.453	184.996	21.0315	5.98895
				233.642	170.402	184.351	21.009	5.91168
				233.814	173.267	184.083	22.272	5.87957
				233.986	172.842	181.809	22.0847	5.60714
				234.158	169.961	179.701	20.8146	5.3546
				234.33	170.596	179.781	21.0945	5.36419
				234.502	173.013	178.505	22.1601	5.21132
				234.674	172.787	175.618	22.0604	4.86546
				234.846	174.258	174.453	22.7089	4.72589
				235.017	172.361	171.542	21.8726	4.37715
				235.189	173.36	170.327	22.313	4.23159
				235.361	172.157	167.121	21.7827	3.84751
				235.533	170.833	165.65	21.199	3.67129
				235.705	168.962	163.756	20.3742	3.44438
				235.877	169.328	162.039	20.5355	3.23869
				236.049	169.683	159.222	20.692	2.90121
				236.221	165.898	159.469	19.0234	2.9308
				236.393	158.691	159.916	15.8463	2.98435
				236.565	155.068	157.89	14.2491	2.74163
				236.737	154.328	157.808	13.9228	2.73181
				236.909	153.853	158.312	13.7134	2.79219
				237.08	153.06	157.774	13.3638	2.72774
				237.252	153.528	159.086	13.5702	2.88492
				237.424	152.419	157.585	13.0813	2.7051
				237.596	152.705	157.732	13.2073	2.72271
				237.768	152.277	157.289	13.0187	2.66963
				237.94	152.292	157.889	13.0253	2.74151
				238.112	151.363	157.722	12.6157	2.72151
				238.284	152.308	156.26	13.0323	2.54636
				238.456	153.279	157.728	13.4604	2.72223
				238.628	152.637	157.388	13.1774	2.68149
				238.8	150.514	155.899	12.2414	2.50311
				238.972	150.673	155.963	12.3115	2.51078
				239.144	148.999	156.501	11.5736	2.57523
				239.315	147.816	156.234	11.052	2.54324
				239.487	147.347	154.252	10.8453	2.3058
				239.659	147.841	152.779	11.0631	2.12933
				239.831	149.155	154.25	11.6423	2.30556
				240.003	149.491	153.061	11.7905	2.16312
				240.175	149.439	152.755	11.7675	2.12646
				240.347	150.704	152.743	12.3252	2.12502
				240.519	151.126	152.533	12.5112	2.09986
				240.691	151.377	151.223	12.6219	1.94292
				240.863	150.362	152.199	12.1744	2.05985
				241.035	150.177	152.181	12.0929	2.05769
				241.207	148.943	152	11.5489	2.03601
				241.379	151.136	151.654	12.5157	1.99456
				241.55	151.793	150.205	12.8053	1.82097
				241.722	149.82	149.634	11.9355	1.75256
				241.894	148.16	151.074	11.2037	1.92507
				242.066	146.253	151.149	10.363	1.93406
				242.238	144.162	149.721	9.44118	1.76298
				242.41	143.292	150.777	9.05765	1.88949
				242.582	142.81	149.356	8.84516	1.71926
				242.754	144.954	150.085	9.79033	1.80659
				242.926	144.958	150.136	9.7921	1.8127
				243.098	145.324	148.17	9.95345	1.57717
				243.27	147.531	148.674	10.9264	1.63755
				243.442	146.974	148.526	10.6808	1.61982
				243.614	146.679	148.082	10.5508	1.56663
				243.785	145.324	148.733	9.95345	1.64462
				243.957	145.457	146.091	10.0121	1.32811
				244.129	147.043	146.007	10.7113	1.31805
				244.301	147.382	144.974	10.8607	1.19429
				244.473	147.271	143.866	10.8118	1.06155
				244.645	147.435	143.491	10.8841	1.01663
				244.817	145.646	144.143	10.0954	1.09474
				244.989	143.303	142.79	9.06249	0.932647
				245.161	141.49	141.837	8.26324	0.818477
				245.333	141.721	141.473	8.36507	0.77487
				245.505	143.309	141.49	9.06514	0.776906
				245.677	144.075	140.908	9.40283	0.707182
				245.849	142.558	139.709	8.73406	0.563542
				246.02	140.617	140.627	7.87838	0.673518
				246.192	141.179	140.116	8.12614	0.6123
				246.364	142.142	141.071	8.55067	0.72671
				246.536	141.577	141.384	8.30159	0.764207
				246.708	141.577	140.548	8.30159	0.664054
				246.88	142.664	139.312	8.78079	0.515981
				247.052	141.647	139.486	8.33245	0.536826
				247.224	140.04	139.281	7.62401	0.512267
				247.396	139.647	140.046	7.45076	0.603914
				247.568	138.352	139.955	6.87986	0.593013
				247.74	138.29	140.075	6.85253	0.607389
				247.912	139.85	140.106	7.54025	0.611102
				248.083	140.716	140.258	7.92202	0.629312
				248.255	139.441	139.875	7.35994	0.583428
				248.427	137.583	139.858	6.54085	0.581392
				248.599	134.787	138.452	5.30824	0.412952
				248.771	134.103	138.443	5.0067	0.411874
				248.943	134.032	139.019	4.9754	0.480879
				249.115	134.408	138.264	5.14116	0.39043
				249.287	133.912	137.26	4.9225	0.27015
				249.459	135.048	137.063	5.4233	0.246549
				249.631	135.608	137.326	5.67018	0.278057
				249.803	136.725	137.181	6.1626	0.260686
				249.975	138.656	137.433	7.01388	0.290876
				250.147	139.299	137.318	7.29734	0.277099
				250.318	141.066	137.755	8.07632	0.329451
				250.49	140.718	138.895	7.9229	0.466024
				250.662	138.207	138.567	6.81594	0.426729
				250.834	137.164	138.601	6.35613	0.430803
				251.006	138.64	137.906	7.00682	0.347541
				251.178	138.586	138.188	6.98302	0.381325
				251.35	138.31	138.307	6.86134	0.395581
				251.522	140.452	137.522	7.80564	0.301538
				251.694	140.513	138.175	7.83253	0.379768
				251.866	139.944	137.563	7.58169	0.30645
				252.038	137.126	137.767	6.33938	0.330889
				252.21	133.097	137.496	4.56321	0.298423
				252.382	132.989	137.692	4.5156	0.321904
				252.553	132.144	137.608	4.14308	0.311841
				252.725	131.531	138.239	3.87284	0.387435
				252.897	131.881	138.203	4.02714	0.383122
				253.069	131.616	138.37	3.91031	0.403129
				253.241	130.87	138.248	3.58144	0.388513
				253.413	131.682	138.475	3.93941	0.415708
				253.585	129.965	137.094	3.18248	0.250263
				253.757	131.102	137.637	3.68372	0.315315
				253.929	132.671	137.82	4.37541	0.337238
				254.101	131.902	136.847	4.0364	0.220673
				254.273	130.848	136.907	3.57174	0.227861
				254.445	130.608	137.297	3.46594	0.274583
				254.617	130.283	137.247	3.32266	0.268593
				254.788	128.948	137.877	2.73413	0.344067
				254.96	129.178	137.639	2.83553	0.315555
				255.132	128.448	138.706	2.51371	0.443382
				255.304	128.128	136.924	2.37264	0.229897
				255.476	127.828	136.85	2.24039	0.221032
				255.648	126.441	136.262	1.62893	0.150589
				255.82	127.143	138.001	1.9384	0.358922
				255.992	127.353	137.884	2.03098	0.344906
				256.164	128.437	137.993	2.50886	0.357964
				256.336	127.971	137.6	2.30343	0.310882
				256.508	127.362	136.506	2.03495	0.179821
				256.68	127.021	136.488	1.88462	0.177664
				256.852	127.066	136.596	1.90446	0.190603
				257.023	127.318	137.854	2.01555	0.341312
				257.195	127.938	137.819	2.28888	0.337119
				257.367	127.669	137.768	2.17029	0.331009
				257.539	127.51	137.532	2.1002	0.302736
				257.711	126.571	137.512	1.68624	0.30034
				257.883	125.131	137.686	1.05142	0.321185
				258.055	125.732	137.202	1.31637	0.263202
				258.227	126.708	137.611	1.74664	0.3122
				258.399	125.838	136.771	1.3631	0.211568
				258.571	126.843	137.503	1.80615	0.299262
				258.743	127.087	137.459	1.91372	0.29399
				258.915	127.596	136.771	2.13811	0.211568
				259.087	126.674	137.995	1.73165	0.358204
				259.258	126.347	137.381	1.58749	0.284646
				259.43	128.007	137.543	2.3193	0.304054
				259.602	129.421	138.236	2.94265	0.387075
				259.774	129.931	137.249	3.16749	0.268832
				259.946	129.28	137.016	2.8805	0.240919
				260.118	127.191	136.803	1.95957	0.215401
				260.29	126.822	136.738	1.79689	0.207614
				260.462	125.793	136.16	1.34326	0.13837
				260.634	125.419	135.005	1.17838	0
				260.806	126.334	135.462	1.58176	0.0547488
				260.978	127.212	136.288	1.96882	0.153704
				261.15	127.002	136.958	1.87625	0.23397
				261.322	126.148	137.679	1.49976	0.320347
				261.493	125.861	137.805	1.37324	0.335441
				261.665	125.857	137.309	1.37148	0.27602
				261.837	124.52	136.748	0.782063	0.208812
				262.009	123.616	137.573	0.383537	0.307648
				262.181	123.644	137.268	0.395881	0.271109
				262.353	123.897	136.834	0.507415	0.219115
				262.525	124.529	136.556	0.78603	0.185811
				262.697	124.777	136.051	0.895361	0.125311
				262.869	124.597	135.319	0.816008	0.0376174
				263.041	124.908	136.001	0.953111	0.119321
				263.213	124.918	136.583	0.95752	0.189045
				263.385	124.635	136.2	0.83276	0.143162
				263.556	124.517	137.026	0.78074	0.242117
				263.728	124.825	136.743	0.916521	0.208213
				263.9	124.296	136.24	0.683313	0.147954
				264.072	123.885	136.816	0.502125	0.216959
				264.244	125.038	136.398	1.01042	0.166882
				264.416	124.109	136.447	0.600875	0.172752
				264.588	123.902	136.903	0.509619	0.227381
				264.76	124.145	137.341	0.616745	0.279854
				264.932	124.522	137.386	0.782945	0.285245
				265.104	123.783	135.595	0.457158	0.0706823
				265.276	124.814	135.885	0.911672	0.105424
				265.448	124.996	137.368	0.991906	0.283089
				265.62	124.189	136.414	0.636142	0.168799
				265.791	123.683	137.061	0.413074	0.24631
				265.963	123.979	137.64	0.543565	0.315674
				266.135	124.218	136.415	0.648927	0.168919
				266.307	124.56	136.781	0.799697	0.212766
				266.479	124.833	137.035	0.920048	0.243195
				266.651	124.127	137.827	0.60881	0.338077
				266.823	124.23	136.905	0.654217	0.227621
				266.995	124.73	136.385	0.874641	0.165325
				267.167	124.94	135.948	0.967219	0.112972
				267.339	124.649	136.579	0.838932	0.188566
				267.511	123.875	136.004	0.497716	0.119681
				267.683	124.774	136.37	0.894038	0.163528
				267.855	124.617	135.918	0.824825	0.109378
				268.026	124.494	137.164	0.770601	0.258649
				268.198	124.21	136.006	0.6454	0.11992
				268.37	123.799	136.605	0.464212	0.191681
				268.542	124.046	136.931	0.573101	0.230736
				268.714	123.956	136.06	0.533425	0.12639
				268.886	123.636	136.227	0.392354	0.146396
				269.058	123.026	135.57	0.123437	0.0676873
				269.23	123.926	136.713	0.5202	0.204619
				269.402	124.782	136.552	0.897565	0.185331
				269.574	125.912	137.306	1.39572	0.275661
				269.746	124.792	135.81	0.901973	0.0964394
				269.918	123.891	135.857	0.50477	0.10207
				270.09	124.476	136.026	0.762666	0.122316
				270.261	124.076	136.031	0.586327	0.122915
				270.433	123.934	136.61	0.523726	0.19228
				270.605	123.859	136.242	0.490663	0.148193
				270.777	123.646	135.544	0.396762	0.0645725
				270.949	124.357	135.938	0.710205	0.111774
				271.121	123.961	136.222	0.535629	0.145797
				271.293	123.942	136.158	0.527253	0.13813
				271.465	123.914	135.348	0.514909	0.0410916
				271.637	124.064	136.443	0.581037	0.172273
				271.809	124.066	135.612	0.581918	0.0727189
				271.981	124.052	136.197	0.575746	0.142802
				272.153	124.343	136.973	0.704033	0.235767
				272.324	123.92	136.339	0.517555	0.159814
				272.496	123.929	136.845	0.521522	0.220433
				272.668	123.966	136.762	0.537834	0.210489
				272.84	124.199	135.946	0.640551	0.112732
				273.012	124.773	136.205	0.893597	0.143761
				273.184	123.88	135.917	0.499921	0.109258
				273.356	124.467	136.05	0.758698	0.125192
				273.528	124.174	136.523	0.62953	0.181857
				273.7	124.013	136.334	0.558553	0.159215
				273.872	123.791	136.827	0.460685	0.218277
				274.044	123.65	135.725	0.398526	0.0862564
				274.216	123.74	135.761	0.438202	0.0905692
				274.388	123.895	135.877	0.506533	0.104466
				274.559	124.33	136.126	0.698302	0.134296
				274.731	124.283	135.747	0.677582	0.088892
				274.903	123.723	135.884	0.430708	0.105305
				275.075	124.231	136.545	0.654658	0.184493
				275.247	124.021	136.146	0.56208	0.136692
				275.419	123.161	135.888	0.182952	0.105784
				275.591	122.788	136.697	0.0185156	0.202702
				275.763	123.759	136.338	0.446578	0.159694
				275.935	123.293	135.417	0.241143	0.0493578
				276.107	123.287	135.549	0.238498	0.0651715
				276.279	122.967	135.732	0.0974272	0.087095
				276.451	124.265	135.373	0.669647	0.0440866
				276.623	123.974	136.742	0.54136	0.208093
				276.794	123.518	135.92	0.340334	0.109617
				276.966	123.669	135.168	0.406902	0.0195275
				277.138	122.749	135.601	0.00132254	0.0714011
				277.31	123.816	135.993	0.471706	0.118363
				277.482	122.746	135.292	0	0.0343827
				277.654	122.914	135.351	0.0740623	0.041451
				277.826	122.909	135.038	0.0718581	0.00395342
				277.998	123.465	135.566	0.316969	0.0672081
				278.17	123.329	135.623	0.257014	0.0740367
				278.342	123.58	135.072	0.367667	0.00802663
				278.514	123.88	136.35	0.499921	0.161132
				278.686	123.682	136.798	0.412633	0.214802
