# Supplementary material for: Direct visualization of a native Wnt in vivo reveals that a long-range Wnt gradient forms by extracellular dispersal
Source: eLife journal article supplement (doi:10.7554/elife.38325), 2018-08-14
Supplement: supp [file elife-38325-supp-v1.zip › elife_poa_e38325_Figure_6_source_data_1.xlsx]

## Sheet: Sheet1
	Figure 6 - source data 1. Fluorescence intensity values for profile plots
	Distance (microns)	Raw EGL-20::YPET fluorescence intensity (AU)	Raw EGL-20::YPET + Morphotrap fluorescence intensity (AU)	Normalized EGL-20::YPET fluorescence intensity (AU)	Normalized EGL-20::YPET + Morphotrap fluorescence intensity (AU)
	0	21.217	19.655	0.150416	0.0847514
	0.343844	20.104	18.214	0	0.064174
	0.687688	21.281	18.277	0.159065	0.0650737
	1.03153	21.193	18.885	0.147173	0.0737559
	1.37538	21.297	20.946	0.161228	0.103187
	1.71922	21.267	19.634	0.157173	0.0844516
	2.06306	20.192	19.889	0.0118927	0.0880929
	2.40691	21.49	20.967	0.187311	0.103487
	2.75075	21.715	19.84	0.217718	0.0873932
	3.0946	22.848	19.931	0.370837	0.0886927
	3.43844	22.383	20.125	0.307995	0.091463
	3.78228	22.364	20.87	0.305427	0.102102
	4.12613	22.444	21.166	0.316239	0.106328
	4.46997	22.184	21.196	0.281101	0.106757
	4.81382	23.109	20.698	0.40611	0.0996454
	5.15766	22.228	22.168	0.287048	0.120637
	5.50151	22.649	22.233	0.343944	0.121565
	5.84535	21.989	21.873	0.254748	0.116424
	6.18919	23.886	21.821	0.511118	0.115682
	6.53304	22.2	21.635	0.283264	0.113026
	6.87688	22.451	22.487	0.317185	0.125192
	7.22073	23.641	22.486	0.478007	0.125178
	7.56457	23.576	21.884	0.469223	0.116581
	7.90841	24.214	23.186	0.555445	0.135174
	8.25226	25.126	23.132	0.678697	0.134403
	8.5961	25.061	22.982	0.669913	0.132261
	8.93995	24.253	23.597	0.560716	0.141043
	9.28379	24.876	23.871	0.644911	0.144956
	9.62763	25.959	22.418	0.791273	0.124207
	9.97148	24.303	22.707	0.567473	0.128334
	10.3153	24.157	24.14	0.547742	0.148797
	10.6592	23.633	24.578	0.476926	0.155052
	11.003	24.864	22.325	0.643289	0.122879
	11.3469	26.173	22.616	0.820194	0.127034
	11.6907	23.168	25.665	0.414084	0.170574
	12.0345	25.03	25.448	0.665723	0.167475
	12.3784	25.119	24.674	0.677751	0.156422
	12.7222	25.538	25.912	0.734377	0.174101
	13.0661	25.671	24.424	0.752351	0.152852
	13.4099	26.496	24.413	0.863846	0.152695
	13.7538	25.836	23.677	0.77465	0.142185
	14.0976	25.061	22.593	0.669913	0.126706
	14.4415	25.742	22.968	0.761946	0.132061
	14.7853	24.903	22.531	0.64856	0.125821
	15.1291	26.179	24.022	0.821005	0.147112
	15.473	25.257	25.393	0.696401	0.16669
	15.8168	27.835	25.447	1.0448	0.167461
	16.1607	29.225	25.895	1.23266	0.173858
	16.5045	29.789	26.405	1.30888	0.181141
	16.8484	28.174	25.253	1.09062	0.164691
	17.1922	29.618	24.887	1.28577	0.159464
	17.536	30.977	26.707	1.46943	0.185454
	17.8799	35.642	26.365	2.09988	0.18057
	18.2237	36.687	24.597	2.24111	0.155323
	18.5676	34.01	26.106	1.87932	0.176871
	18.9114	33.264	28.121	1.77851	0.205645
	19.2553	33.339	28.606	1.78864	0.212571
	19.5991	33.711	26.074	1.83892	0.176414
	19.943	35.91	25.798	2.1361	0.172473
	20.2868	39.659	26.398	2.64276	0.181041
	20.6306	39.929	27.317	2.67925	0.194164
	20.9745	38.228	27.097	2.44936	0.191023
	21.3183	38.751	26.969	2.52005	0.189195
	21.6622	39.929	28.332	2.67925	0.208658
	22.006	44.087	29.281	3.24118	0.22221
	22.3499	46.266	29.003	3.53566	0.21824
	22.6937	46.609	31.621	3.58201	0.255625
	23.0376	45.189	30.937	3.39011	0.245858
	23.3814	45.532	28.511	3.43646	0.211215
	23.7252	43.895	28.403	3.21523	0.209672
	24.0691	44.076	29.872	3.23969	0.23065
	24.4129	45.89	29.939	3.48484	0.231606
	24.7568	52.583	30.128	4.38937	0.234305
	25.1006	60.292	29.099	5.4312	0.219611
	25.4445	69.605	30.055	6.6898	0.233263
	25.7883	63.43	30.656	5.85528	0.241845
	26.1321	54.762	32.514	4.68385	0.268377
	26.476	49.833	30.336	4.01772	0.237275
	26.8198	53.817	29.648	4.55614	0.227451
	27.1637	63.5	30.779	5.86474	0.243601
	27.5075	79.404	31.957	8.01409	0.260423
	27.8514	88.52	32.263	9.24607	0.264793
	28.1952	90.741	34.339	9.54622	0.294438
	28.5391	93.791	42.044	9.95842	0.404465
	28.8829	80.266	47.193	8.13058	0.477992
	29.2267	74.622	48.858	7.36782	0.501768
	29.5706	74.887	49.442	7.40364	0.510108
	29.9144	85.179	55.491	8.79455	0.596487
	30.2583	83.636	44.631	8.58602	0.441407
	30.6021	90.384	40.408	9.49798	0.381103
	30.946	92.61	39.327	9.79881	0.365666
	31.2898	87.019	37.277	9.04322	0.336393
	31.6337	85.741	38.566	8.8705	0.354799
	31.9775	83.628	47.555	8.58494	0.483162
	32.3213	88.451	52.137	9.23674	0.548592
	32.6652	90.321	53.909	9.48946	0.573896
	33.009	89.627	51.928	9.39567	0.545608
	33.3529	87.397	47.516	9.0943	0.482605
	33.6967	81.787	42.718	8.33614	0.41409
	34.0406	78.486	42.553	7.89002	0.411733
	34.3844	87.933	44.279	9.16674	0.436381
	34.7283	88.953	50.566	9.30459	0.526159
	35.0721	86.05	54.644	8.91226	0.584392
	35.4159	95.962	43.849	10.2518	0.43024
	35.7598	99.163	46.546	10.6844	0.468753
	36.1036	97.194	50.044	10.4183	0.518705
	36.4475	103.701	65.149	11.2977	0.734403
	36.7913	112.129	120.36	12.4367	1.52281
	37.1352	111.312	313.667	12.3263	4.28322
	37.479	110.168	280.055	12.1717	3.80325
	37.8228	113.689	116.799	12.6475	1.47196
	38.1667	96.296	64.238	10.297	0.721394
	38.5105	95.854	62.721	10.2372	0.699731
	38.8544	104.638	61.976	11.4243	0.689093
	39.1982	101.062	83.71	10.9411	0.999453
	39.5421	104.427	129.601	11.3958	1.65477
	39.8859	109.436	156.052	12.0728	2.03249
	40.2298	104.639	99.543	11.4245	1.22555
	40.5736	98.991	79.49	10.6612	0.939192
	40.9174	101.855	83.059	11.0482	0.990157
	41.2613	121.314	122.068	13.678	1.5472
	41.6051	141.972	219.212	16.4698	2.93441
	41.949	144.646	206.264	16.8312	2.74952
	42.2928	163.534	143.403	19.3838	1.85187
	42.6367	184.834	150.375	22.2624	1.95143
	42.9805	199.399	131.516	24.2308	1.68212
	43.3244	204.767	134.793	24.9562	1.72892
	43.6682	195.134	165.746	23.6544	2.17092
	44.012	188.68	175.18	22.7822	2.30564
	44.3559	182.416	197.67	21.9356	2.62679
	44.6997	175.276	214.421	20.9707	2.866
	45.0436	175.42	210.641	20.9902	2.81202
	45.3874	175.742	218.72	21.0337	2.92739
	45.7313	173.297	236.588	20.7032	3.18254
	46.0751	169.255	299.795	20.157	4.08513
	46.4189	164.255	321.656	19.4813	4.39731
	46.7628	175.38	224.295	20.9847	3.007
	47.1066	183.263	256.227	22.0501	3.46299
	47.4505	197.219	326.818	23.9362	4.47102
	47.7943	210.736	345.185	25.7629	4.7333
	48.1382	231.486	359.159	28.5672	4.93285
	48.482	239.402	456.043	29.637	6.31635
	48.8259	233.768	458.326	28.8756	6.34895
	49.1697	244.963	396.824	30.3885	5.4707
	49.5135	244.651	405.443	30.3464	5.59378
	49.8574	245.193	440.654	30.4196	6.09659
	50.2012	237.756	456.339	29.4145	6.32057
	50.5451	232.813	461.379	28.7465	6.39254
	50.8889	246.386	627.349	30.5808	8.76258
	51.2328	232.492	782.443	28.7031	10.9773
	51.5766	232.82	619.283	28.7475	8.6474
	51.9205	251.925	631.928	31.3294	8.82797
	52.2643	257.289	680.853	32.0543	9.52662
	52.6081	265.473	602.905	33.1603	8.41353
	52.952	287.047	663.588	36.076	9.28008
	53.2958	307.871	651.974	38.8902	9.11423
	53.6397	321.585	684.803	40.7436	9.58302
	53.9835	338.894	775.211	43.0828	10.874
	54.3274	364.075	807.617	46.4859	11.3368
	54.6712	392.652	959.584	50.3479	13.5069
	55.0151	418.015	1233.13	53.7756	17.4132
	55.3589	523.445	1405.58	68.0239	19.8756
	55.7027	587.168	1801.99	76.6358	25.5363
	56.0466	592.005	2176.23	77.2895	30.8805
	56.3904	611.043	2691.51	79.8623	38.2386
	56.7343	637.148	3061.89	83.3903	43.5276
	57.0781	664.625	3012.8	87.1037	42.8266
	57.422	690.947	2757.73	90.661	39.1844
	57.7658	713.485	3749.57	93.7068	53.3477
	58.1096	724.371	4020.15	95.178	57.2115
	58.4535	719.675	3398.14	94.5434	48.3293
	58.7973	655.527	3449.72	85.8741	49.0658
	59.1412	570.147	3994.9	74.3355	56.851
	59.485	552.273	4562.95	71.9199	64.9627
	59.8289	515.758	4958.74	66.9851	70.6146
	60.1727	479.648	4261.33	62.105	60.6557
	60.5166	461.946	3519.3	59.7127	50.0595
	60.8604	460.258	3476.6	59.4845	49.4497
	61.2042	472.785	5263.19	61.1775	74.9621
	61.5481	479.684	6364.85	62.1099	90.6938
	61.8919	475.149	6484.75	61.497	92.4059
	62.2358	502.354	6735.85	65.1736	95.9916
	62.5796	538.123	7016.55	70.0076	100
	62.9235	565.959	6219.12	73.7695	88.6128
	63.2673	638.87	6109.73	83.623	87.0506
	63.6112	711.446	5328.48	93.4313	75.8944
	63.955	741.43	4422.1	97.4835	62.9514
	64.2988	760.051	3414.22	100	48.5589
	64.6427	728.953	3284.98	95.7973	46.7134
	64.9865	690.729	3463.68	90.6315	49.2652
	65.3304	654.511	3845.64	85.7368	54.7196
	65.6742	617.809	4523.1	80.7767	64.3936
	66.0181	621.634	5378.73	81.2937	76.6121
	66.3619	622.562	5588	81.4191	79.6004
	66.7058	581.833	5672.48	75.9148	80.8067
	67.0496	536.388	6124.8	69.7731	87.2659
	67.3934	495.23	5536.55	64.2108	78.8656
	67.7373	454.031	4791.46	58.643	68.2258
	68.0811	445.019	4070.44	57.4251	57.9297
	68.425	451.776	3961.26	58.3382	56.3706
	68.7688	454.094	4594.42	58.6515	65.4121
	69.1127	466.891	4625.62	60.3809	65.8576
	69.4565	496.078	4146.19	64.3254	59.0115
	69.8003	530.141	4682.23	68.9289	66.6661
	70.1442	529.113	4906.23	68.7899	69.8648
	70.488	519.454	3802.52	67.4846	54.1039
	70.8319	497.942	4158.33	64.5773	59.1847
	71.1757	443.757	5826.8	57.2545	83.0104
	71.5196	448.908	4746.78	57.9506	67.5878
	71.8634	450.423	3026.34	58.1554	43.0201
	72.2073	439.777	2338.37	56.7166	33.1958
	72.5511	455.306	2646.09	58.8153	37.5901
	72.8949	508.455	3503.34	65.9981	49.8316
	73.2388	522.999	3681.65	67.9637	52.3778
	73.5826	492.744	3373.36	63.8748	47.9755
	73.9265	480.756	3109.72	62.2547	44.2107
	74.2703	496.667	4102.67	64.405	58.3899
	74.6142	529.567	3358.26	68.8513	47.7599
	74.958	511.421	1801.08	66.3989	25.5234
	75.3019	488.724	1188.77	63.3316	16.7797
	75.6457	482.189	1180.33	62.4484	16.6592
	75.9895	484.265	1774.12	62.729	25.1384
	76.3334	494.246	2335.39	64.0778	33.1533
	76.6772	496.961	1980.1	64.4448	28.0798
	77.0211	466.929	1703.27	60.3861	24.1266
	77.3649	406.406	2028.61	52.2067	28.7724
	77.7088	375.923	2428.07	48.0871	34.4767
	78.0526	380.667	2895.4	48.7282	41.1502
	78.3964	386.87	2947.78	49.5665	41.8981
	78.7403	422.208	2397.89	54.3423	34.0459
	79.0841	419.103	2392.17	53.9226	33.9641
	79.428	386.667	2094.24	49.5391	29.7097
	79.7718	382.155	1403.05	48.9293	19.8395
	80.1157	409.911	975.473	52.6804	13.7338
	80.4595	426.637	972.042	54.9408	13.6848
	80.8034	407.609	1545.56	52.3693	21.8746
	81.1472	403.765	1505.07	51.8498	21.2964
	81.491	427.626	1500.67	55.0745	21.2336
	81.8349	462.443	1421.75	59.7798	20.1066
	82.1787	492.609	1444.28	63.8566	20.4283
	82.5226	457.566	1970.24	59.1207	27.939
	82.8664	452.838	2347.81	58.4818	33.3306
	83.2103	500.012	2489.29	64.8571	35.351
	83.5541	528.748	2261.59	68.7406	32.0994
	83.898	545.353	1940.87	70.9847	27.5196
	84.2418	531.619	1664.72	69.1286	23.5763
	84.5856	523.859	1584.37	68.0799	22.4288
	84.9295	515.578	1423.06	66.9607	20.1253
	85.2733	519.494	1224.94	67.49	17.2962
	85.6172	525.398	1132.2	68.2879	15.9719
	85.961	504.708	1074.05	65.4917	15.1414
	86.3049	493.367	1181.24	63.959	16.6721
	86.6487	500.199	1064.85	64.8823	15.01
	86.9926	501.798	1052.63	65.0984	14.8356
	87.3364	466.836	1030.59	60.3735	14.5209
	87.6802	459.801	990.146	59.4228	13.9433
	88.0241	470.037	1048.37	60.8061	14.7747
	88.3679	449.074	961.758	57.9731	13.5379
	88.7118	419.318	897.929	53.9517	12.6265
	89.0556	434.22	758.959	55.9656	10.642
	89.3995	432.205	715.997	55.6933	10.0285
	89.7433	416.963	717.583	53.6334	10.0511
	90.0871	402.382	731.487	51.6629	10.2497
	90.431	432.072	773.237	55.6753	10.8459
	90.7748	478.04	949.886	61.8877	13.3684
	91.1187	482.096	1143.22	62.4358	16.1293
	91.4625	471.268	906.961	60.9725	12.7554
	91.8064	465.945	800.987	60.2531	11.2421
	92.1502	421.928	915.18	54.3044	12.8728
	92.4941	389.851	990.41	49.9694	13.9471
	92.8379	381.967	822.239	48.9039	11.5456
	93.1817	397.826	711.966	51.0472	9.97091
	93.5256	373.493	727.585	47.7587	10.1939
	93.8694	349.773	622.431	44.5531	8.69236
	94.2133	356.293	579.893	45.4342	8.08492
	94.5571	385.602	596.863	49.3952	8.32725
	94.901	432.33	633.321	55.7102	8.84786
	95.2448	464.769	672.316	60.0942	9.40471
	95.5887	438.308	626.189	56.5181	8.74602
	95.9325	393.959	584.945	50.5246	8.15706
	96.2763	377.122	498.101	48.2491	6.91693
	96.6202	397.524	400.3	51.0064	5.52034
	96.964	419.887	357.9	54.0286	4.91487
	97.3079	389.309	421.114	49.8961	5.81756
	97.6517	362.878	391.388	46.3241	5.39308
	97.9956	353.32	349.872	45.0324	4.80023
	98.3394	354.699	323.845	45.2188	4.42857
	98.6832	350.533	372.368	44.6558	5.12147
	99.0271	366.867	522.524	46.8632	7.26569
	99.3709	351.449	684.274	44.7796	9.57547
	99.7148	315.525	645.753	39.9246	9.02539
	100.059	287.279	531.76	36.1073	7.39758
	100.402	301.423	451.085	38.0188	6.24555
	100.746	324.933	431.474	41.1961	5.9655
	101.09	339.351	501.417	43.1446	6.96428
	101.434	348.517	831.89	44.3833	11.6834
	101.778	363.517	731.059	46.4105	10.2436
	102.122	354.908	298.138	45.247	4.06147
	102.466	334.446	213.274	42.4817	2.84962
	102.809	299.635	206.34	37.7772	2.7506
	103.153	286.074	205.345	35.9445	2.73639
	103.497	295.488	213.72	37.2167	2.85599
	103.841	303.787	258.876	38.3383	3.50081
	104.185	297.722	378.998	37.5186	5.21615
	104.529	305.087	637.369	38.514	8.90567
	104.872	344.285	711.102	43.8114	9.95857
	105.216	384.414	487.68	49.2346	6.76812
	105.56	367.6	361.966	46.9623	4.97293
	105.904	326.308	338.606	41.3819	4.63935
	106.248	316.442	344.636	40.0485	4.72546
	106.592	312.127	324.947	39.4654	4.4443
	106.936	336.683	372.623	42.784	5.12511
	107.279	350.687	316.005	44.6766	4.31661
	107.623	320.189	251.26	40.5549	3.39206
	107.967	319.964	273.519	40.5245	3.70991
	108.311	351.139	339.894	44.7377	4.65774
	108.655	375.677	442.385	48.0538	6.12131
	108.999	396.401	603.488	50.8546	8.42185
	109.342	380.037	588.918	48.6431	8.21379
	109.686	363.153	421.815	46.3613	5.82757
	110.03	382.04	328.391	48.9138	4.49348
	110.374	433.432	315.083	55.8591	4.30345
	110.718	460.121	363.339	59.466	4.99254
	111.062	470.391	391.063	60.854	5.38844
	111.405	438.53	379.766	56.5481	5.22711
	111.749	431.092	385.548	55.5429	5.30968
	112.093	382.562	332.363	48.9843	4.5502
	112.437	362.554	291.872	46.2803	3.97199
	112.781	363.697	326.22	46.4348	4.46248
	113.125	393.604	352.815	50.4766	4.84226
	113.469	444.683	296.383	57.3797	4.03641
	113.812	459.034	293.666	59.3191	3.99761
	114.156	431.536	355.061	55.6029	4.87433
	114.5	364.132	435.183	46.4936	6.01847
	114.844	340.599	430.567	43.3132	5.95255
	115.188	322.402	315.481	40.854	4.30913
	115.532	318.649	270.613	40.3468	3.66842
	115.875	332.78	262.961	42.2565	3.55915
	116.219	370.661	259.517	47.376	3.50997
	116.563	383.29	241.175	49.0827	3.24804
	116.907	420.109	209.571	54.0586	2.79674
	117.251	416.851	199.935	53.6183	2.65914
	117.595	440.968	203.104	56.8776	2.70439
	117.939	489.891	207.343	63.4893	2.76492
	118.282	454.134	237.166	58.6569	3.1908
	118.626	386.013	272.791	49.4507	3.69952
	118.97	388.023	272.538	49.7223	3.69591
	119.314	388.311	220.13	49.7613	2.94752
	119.658	383.999	199.463	49.1785	2.6524
	120.002	409.374	196.174	52.6078	2.60543
	120.345	375.136	216.199	47.9807	2.89139
	120.689	302.88	233.632	38.2157	3.14033
	121.033	281.167	221.145	35.2813	2.96202
	121.377	278.207	200.117	34.8813	2.66174
	121.721	278.66	212.436	34.9425	2.83765
	122.065	258.343	282.481	32.1968	3.83789
	122.408	266.405	297.583	33.2863	4.05355
	122.752	297.268	305.205	37.4573	4.16239
	123.096	306.982	352.026	38.7701	4.83099
	123.44	281.189	490.453	35.2843	6.80772
	123.784	307.938	604.95	38.8993	8.44273
	124.128	320.169	369.38	40.5522	5.0788
	124.472	295.092	194.373	37.1632	2.57971
	124.815	286.897	134.007	36.0557	1.71769
	125.159	265.497	142.391	33.1636	1.83741
	125.503	269.741	168.147	33.7371	2.20521
	125.847	285.533	170.014	35.8714	2.23187
	126.191	269.502	158.161	33.7048	2.06261
	126.535	251.829	163.341	31.3164	2.13658
	126.878	241.398	195.366	29.9067	2.59389
	127.222	218.368	168.445	26.7944	2.20946
	127.566	208.571	170.752	25.4703	2.24241
	127.91	213.141	205.416	26.0879	2.73741
	128.254	233.859	289.812	28.8879	3.94258
	128.598	246.741	316.702	30.6288	4.32656
	128.942	265.076	251.014	33.1067	3.38854
	129.285	285.339	287.587	35.8451	3.9108
	129.629	281.398	202.794	35.3125	2.69997
	129.973	257.854	164.848	32.1307	2.1581
	130.317	241.665	149.277	29.9428	1.93575
	130.661	225.247	134.296	27.724	1.72182
	131.005	224.318	144.177	27.5985	1.86292
	131.348	216.039	175.326	26.4796	2.30772
	131.692	197.163	183.882	23.9286	2.4299
	132.036	185.907	203.91	22.4074	2.7159
	132.38	189.51	209.701	22.8943	2.7986
	132.724	179.669	189.864	21.5644	2.51533
	133.068	169.888	209.86	20.2425	2.80087
	133.412	165.211	269.132	19.6105	3.64727
	133.755	166.493	248.293	19.7837	3.34969
	134.099	169.493	191.754	20.1891	2.54231
	134.443	191.444	160.181	23.1557	2.09145
	134.787	212.857	181.831	26.0496	2.40061
	135.131	177.48	201.278	21.2686	2.67832
	135.475	179.947	192.436	21.602	2.55205
	135.818	189.922	138.45	22.95	1.78114
	136.162	178.591	128.968	21.4187	1.64573
	136.506	184.204	136.927	22.1773	1.75939
	136.85	203.846	130.803	24.8318	1.67194
	137.194	200.309	132.724	24.3538	1.69937
	137.538	156.098	141.942	18.3789	1.831
	137.881	141.758	126.216	16.4409	1.60644
	138.225	145.712	120.541	16.9753	1.5254
	138.569	162.819	118.615	19.2872	1.49789
	138.913	185.893	113.872	22.4055	1.43016
	139.257	192.044	109.648	23.2368	1.36985
	139.601	172.055	110.294	20.5354	1.37907
	139.945	151.087	117.277	17.7017	1.47879
	140.288	160.777	115.513	19.0112	1.4536
	140.632	179.949	110.339	21.6022	1.37971
	140.976	208.898	107.094	25.5145	1.33338
	141.32	203.285	102.978	24.756	1.2746
	141.664	184.592	97.111	22.2297	1.19082
	142.008	166.542	98.766	19.7903	1.21445
	142.351	151.237	102.115	17.7219	1.26228
	142.695	148.212	102.357	17.3131	1.26573
	143.039	156.926	100.471	18.4908	1.2388
	143.383	153.435	116.723	18.019	1.47088
	143.727	142.541	153.163	16.5467	1.99124
	144.071	153.033	188.431	17.9647	2.49486
	144.415	181.265	188.204	21.7801	2.49162
	144.758	238.793	158.591	29.5547	2.06875
	145.102	196.621	138.16	23.8554	1.777
	145.446	167.363	128.396	19.9013	1.63757
	145.79	159.751	104.453	18.8726	1.29566
	146.134	177.886	102.436	21.3234	1.26686
	146.478	197.192	106.15	23.9325	1.31989
	146.821	204.803	110.153	24.9611	1.37706
	147.165	177.363	102.127	21.2527	1.26245
	147.509	154.412	97.356	18.151	1.19432
	147.853	142.172	99.908	16.4969	1.23076
	148.197	139.52	94.446	16.1385	1.15276
	148.541	147.511	82.433	17.2184	0.981217
	148.884	152.2	80.129	17.8521	0.948316
	149.228	160.414	89.12	18.9622	1.07671
	149.572	162.412	95.122	19.2322	1.16242
	149.916	161.76	86.191	19.1441	1.03488
	150.26	157.868	84.884	18.6181	1.01622
	150.604	158.709	97.928	18.7317	1.20249
	150.948	161.157	97.69	19.0626	1.19909
	151.291	162.578	97.259	19.2546	1.19293
	151.635	166.125	82.755	19.734	0.985816
	151.979	154.976	83.815	18.2273	1.00095
	152.323	145.281	82.245	16.917	0.978533
	152.667	142.777	80.368	16.5786	0.951729
	153.011	146.689	85.67	17.1073	1.02744
	153.354	130.318	100.012	14.8949	1.23224
	153.698	127.77	104.398	14.5505	1.29488
	154.042	125.879	95.162	14.2949	1.16299
	154.386	120.935	80.924	13.6268	0.959669
	154.73	125.292	73.469	14.2156	0.853212
	155.074	124.303	75.467	14.082	0.881743
	155.418	120.728	81.412	13.5988	0.966638
	155.761	122.756	81.848	13.8729	0.972864
	156.105	120.365	80.189	13.5498	0.949173
	156.449	114.855	79.696	12.8051	0.942133
	156.793	108.683	82.089	11.971	0.976305
	157.137	114.496	80.579	12.7566	0.954742
	157.481	118.966	80.93	13.3607	0.959755
	157.824	116.215	78.246	12.9889	0.921427
	158.168	115.086	75.143	12.8363	0.877117
	158.512	115.473	71.288	12.8886	0.822068
	158.856	112.214	70.759	12.4482	0.814513
	159.2	110.037	67.773	12.154	0.771874
	159.544	110.552	66.774	12.2236	0.757608
	159.887	112.128	66.453	12.4366	0.753024
	160.231	106.662	69.493	11.6979	0.796435
	160.575	103.34	71.387	11.2489	0.823481
	160.919	98.449	70.745	10.5879	0.814314
	161.263	92.775	77.65	9.82111	0.912917
	161.607	92.9	82.474	9.838	0.981803
	161.951	96.276	85.847	10.2943	1.02997
	162.294	101.882	78.38	11.0519	0.923341
	162.638	98.315	69.436	10.5698	0.795621
	162.982	93.963	69.017	9.98166	0.789638
	163.326	94.976	73.87	10.1186	0.858938
	163.67	95.284	71.213	10.1602	0.820997
	164.014	92.274	64.163	9.7534	0.720323
	164.357	95.094	66.028	10.1345	0.746955
	164.701	93.063	70.216	9.86003	0.806759
	165.045	90.506	73.644	9.51447	0.855711
	165.389	88.089	73.657	9.18782	0.855897
	165.733	81.677	67.319	8.32127	0.76539
	166.077	82.86	66.341	8.48115	0.751425
	166.421	83.783	67.012	8.60589	0.761007
	166.764	79.735	66.581	8.05882	0.754852
	167.108	80.026	64.774	8.09815	0.729048
	167.452	79.256	63.933	7.99409	0.717039
	167.796	82.532	60.729	8.43682	0.671286
	168.14	82.386	62.373	8.41709	0.694762
	168.484	81.636	65.773	8.31573	0.743314
	168.827	85.322	67.097	8.81387	0.76222
	169.171	88.025	68.85	9.17917	0.787253
	169.515	93.507	66.307	9.92003	0.750939
	169.859	97.316	63.354	10.4348	0.70877
	170.203	99.687	62.775	10.7552	0.700502
	170.547	91.289	61.224	9.62028	0.678354
	170.891	89.641	60.822	9.39756	0.672614
	171.234	96.743	65.072	10.3574	0.733303
	171.578	105.423	69.383	11.5304	0.794864
	171.922	100.992	65.453	10.9316	0.738744
	172.266	97.619	61.846	10.4758	0.687236
	172.61	95.659	61.037	10.2109	0.675684
	172.954	96.424	60.431	10.3143	0.66703
	173.297	99.181	59.667	10.6868	0.65612
	173.641	97.723	61.081	10.4898	0.676312
	173.985	91.253	57.822	9.61542	0.629774
	174.329	87.505	54.874	9.1089	0.587677
	174.673	85.578	56.299	8.84847	0.608026
	175.017	85.933	58.447	8.89645	0.638699
	175.36	85.882	58.137	8.88956	0.634272
	175.704	84.926	59.143	8.76036	0.648638
	176.048	79.253	57.655	7.99368	0.627389
	176.392	78.148	56.571	7.84435	0.61191
	176.736	84.766	54.604	8.73873	0.583821
	177.08	82.24	57.249	8.39736	0.621591
	177.424	80.644	58.831	8.18167	0.644182
	177.767	86.149	63.187	8.92564	0.706386
	178.111	80.481	70.216	8.15964	0.806759
	178.455	78.986	76.695	7.9576	0.899279
	178.799	77.063	76.854	7.69771	0.90155
	179.143	78.908	73.676	7.94706	0.856168
	179.487	79.478	72.159	8.02409	0.834505
	179.83	77.784	69.452	7.79515	0.79585
	180.174	75.719	64.304	7.51608	0.722336
	180.518	76.105	60.611	7.56824	0.669601
	180.862	74.845	57.06	7.39796	0.618893
	181.206	78.419	58.13	7.88097	0.634172
	181.55	81.399	58.773	8.2837	0.643354
	181.894	85.011	58.343	8.77184	0.637214
	182.237	81.895	56.505	8.35073	0.610967
	182.581	88.193	58.997	9.20188	0.646553
	182.925	86.922	56.114	9.03011	0.605384
	183.269	83.699	56.692	8.59453	0.613638
	183.613	80.936	54.865	8.22113	0.587548
	183.957	78.352	54.673	7.87192	0.584806
	184.3	77.425	55.765	7.74664	0.6004
	184.644	76.545	55.136	7.62771	0.591418
	184.988	73.348	56.501	7.19565	0.61091
	185.332	70.974	60.366	6.87482	0.666102
	185.676	70.37	61.255	6.79319	0.678797
	186.02	67.642	60.177	6.42451	0.663403
	186.363	70.993	58.465	6.87738	0.638956
	186.707	69.442	59.099	6.66777	0.648009
	187.051	68.047	61.093	6.47925	0.676484
	187.395	68.735	63.907	6.57223	0.716667
	187.739	71.277	65.497	6.91577	0.739372
	188.083	66.469	63.544	6.26599	0.711484
	188.427	66.929	63.054	6.32816	0.704487
	188.77	65.966	62.096	6.19801	0.690806
	189.114	65.493	60.092	6.13409	0.662189
	189.458	63.987	57.911	5.93056	0.631045
	189.802	60.62	58.659	5.47553	0.641726
	190.146	61.369	61.406	5.57675	0.680953
	190.49	62.222	58.464	5.69203	0.638942
	190.833	60.035	56.587	5.39647	0.612138
	191.177	63.053	56.804	5.80433	0.615237
	191.521	64.948	56.694	6.06043	0.613666
	191.865	66.179	57.747	6.2268	0.628703
	192.209	64.841	57.704	6.04597	0.628089
	192.553	66.836	62.774	6.31559	0.700488
	192.897	67.714	64.12	6.43424	0.719709
	193.24	66.994	61.595	6.33694	0.683652
	193.584	69.423	58.671	6.66521	0.641898
	193.928	68.455	57.007	6.53439	0.618136
	194.272	67.605	54.812	6.41951	0.586791
	194.616	67.707	56.979	6.4333	0.617736
	194.96	66.237	59.929	6.23464	0.659862
	195.303	66.723	58.346	6.30032	0.637257
	195.647	67.015	56.575	6.33978	0.611967
	195.991	67.434	56.57	6.3964	0.611895
	196.335	68.528	58.183	6.54425	0.634929
	196.679	74.017	56.236	7.28606	0.607126
	197.023	71.311	56.737	6.92036	0.61428
	197.366	72.502	54.947	7.08132	0.588719
	197.71	73.513	54.257	7.21795	0.578866
	198.054	71.865	53.826	6.99523	0.572711
	198.398	68.033	52.878	6.47736	0.559174
	198.742	65.37	55.451	6.11747	0.595916
	199.086	67.211	55.687	6.36627	0.599286
	199.43	65.587	55.508	6.14679	0.59673
	199.773	67.004	57.015	6.33829	0.61825
	200.117	70.789	53.746	6.84981	0.571569
	200.461	70.572	54.346	6.82049	0.580137
	200.805	67.421	52.957	6.39465	0.560302
	201.149	69.318	53.575	6.65102	0.569127
	201.493	75.01	53.505	7.42026	0.568127
	201.836	71.569	54.72	6.95523	0.585478
	202.18	75.771	53.837	7.52311	0.572868
	202.524	72.769	56.096	7.1174	0.605127
	202.868	69.684	59.454	6.70048	0.653079
	203.212	66.887	57.61	6.32248	0.626747
	203.556	69.442	56.314	6.66777	0.60824
	203.9	65.334	57.023	6.1126	0.618364
	204.243	63.885	57.68	5.91678	0.627746
	204.587	63.349	58.974	5.84434	0.646224
	204.931	68.666	55.017	6.5629	0.589719
	205.275	74.667	58.365	7.37391	0.637528
	205.619	74.578	57.934	7.36188	0.631373
	205.963	68.932	56.549	6.59885	0.611596
	206.306	64.404	57.915	5.98692	0.631102
	206.65	62.995	58.745	5.7965	0.642954
	206.994	65.323	58.701	6.11111	0.642326
	207.338	67.283	56.249	6.376	0.607312
	207.682	67.954	56.388	6.46668	0.609296
	208.026	67.61	52.401	6.42019	0.552362
	208.37	65.798	50.171	6.17531	0.520518
	208.713	65.052	49.848	6.07449	0.515906
	209.057	63.369	50.124	5.84704	0.519847
	209.401	64.791	50.831	6.03922	0.529943
	209.745	67.131	51.261	6.35546	0.536083
	210.089	66.985	51.382	6.33572	0.537811
	210.433	61.635	52.488	5.6127	0.553605
	210.776	62.109	50.688	5.67676	0.527901
	211.12	59.689	48.754	5.34971	0.500283
	211.464	58.575	52.495	5.19916	0.553705
	211.808	60.049	51.132	5.39836	0.534241
	212.152	63.98	50.484	5.92961	0.524988
	212.496	64.205	51.245	5.96002	0.535855
	212.839	62.463	53.269	5.7246	0.564757
	213.183	60.019	53.72	5.39431	0.571198
	213.527	59.878	52.774	5.37525	0.557689
	213.871	59.43	50.607	5.3147	0.526744
	214.215	61.832	48.695	5.63932	0.499441
	214.559	65.113	45.6	6.08273	0.455244
	214.903	65.683	47.153	6.15977	0.477421
	215.246	66.737	45.116	6.30221	0.448333
	215.59	64.546	46.452	6.00611	0.467411
	215.934	62.904	46.759	5.7842	0.471795
	216.278	61.396	46.683	5.5804	0.47071
	216.622	61.471	48.131	5.59054	0.491387
	216.966	58.571	47.909	5.19862	0.488217
	217.309	59.798	46.412	5.36444	0.46684
	217.653	59.89	45.576	5.37687	0.454902
	217.997	57.636	47.361	5.07226	0.480391
	218.341	55.632	45.184	4.80142	0.449304
	218.685	56.596	47.248	4.9317	0.478778
	219.029	59.464	45.189	5.3193	0.449375
	219.373	60.164	45.584	5.4139	0.455016
	219.716	62.809	44.984	5.77136	0.446448
	220.06	66.317	43.521	6.24545	0.425556
	220.404	65.579	42.575	6.14571	0.412048
	220.748	60.215	45.152	5.42079	0.448847
	221.092	57.813	47.213	5.09618	0.478278
	221.436	60.681	47.881	5.48377	0.487817
	221.779	60.887	46.208	5.51161	0.463927
	222.123	60.205	45.81	5.41944	0.458243
	222.467	59.835	44.911	5.36944	0.445406
	222.811	60.623	42.981	5.47593	0.417845
	223.155	59.038	42.97	5.26173	0.417688
	223.499	57.452	42.196	5.04739	0.406636
	223.842	56.285	39.676	4.88967	0.37065
	224.186	56.843	42.423	4.96509	0.409877
	224.53	56.838	41.362	4.96441	0.394726
	224.874	56.071	42.03	4.86075	0.404265
	225.218	55.703	44.331	4.81102	0.437123
	225.562	56.933	46.123	4.97725	0.462713
	225.906	56.333	44.997	4.89616	0.446634
	226.249	55.372	42.796	4.76629	0.415204
	226.593	58.017	43.775	5.12375	0.429184
	226.937	59.469	44.866	5.31998	0.444763
	227.281	60.998	43.999	5.52661	0.432382
	227.625	61.653	45.757	5.61513	0.457486
	227.969	57.384	45.921	5.0382	0.459828
	228.312	60.367	47.655	5.44134	0.48459
	228.656	68.041	46.262	6.47844	0.464698
	229	65.703	44.294	6.16247	0.436595
	229.344	63.83	49.278	5.90934	0.507766
	229.688	63.038	52.769	5.80231	0.557617
	230.032	60.359	47.626	5.44025	0.484176
	230.376	56.275	45.477	4.88832	0.453488
	230.719	54.3	45.805	4.62141	0.458172
	231.063	52.361	43.167	4.35937	0.420501
	231.407	53.176	41.508	4.46951	0.396811
	231.751	53.641	43.901	4.53235	0.430983
	232.095	51.998	43.858	4.31031	0.430369
	232.439	54.056	41.403	4.58844	0.395312
	232.782	58.781	40.21	5.227	0.378276
	233.126	57.459	41.407	5.04833	0.395369
	233.47	55.254	43.125	4.75034	0.419902
	233.814	58.42	45.071	5.17821	0.44769
	234.158	61.594	43.106	5.60716	0.41963
	234.502	60.232	41.744	5.42309	0.400181
	234.846	55.955	42.898	4.84508	0.41666
	235.189	54.627	42.36	4.6656	0.408977
	235.533	55.354	43.018	4.76385	0.418374
	235.877	54.743	43.055	4.68128	0.418902
	236.221	54.042	44.141	4.58654	0.43441
	236.565	52.634	42.997	4.39626	0.418074
	236.909	55.143	41.182	4.73534	0.392156
	237.252	52.23	41.021	4.34166	0.389857
	237.596	50.233	42.308	4.07178	0.408235
	237.94	52.18	44.087	4.33491	0.433639
	238.284	55.953	40.858	4.84481	0.387529
	238.628	56.563	39.133	4.92724	0.362896
	238.972	57.481	38.025	5.05131	0.347074
	239.315	58.389	41.661	5.17402	0.398996
	239.659	60.965	40.41	5.52215	0.381132
	240.003	59.464	39.995	5.3193	0.375205
	240.347	56.113	40.924	4.86643	0.388471
	240.691	55.721	42.774	4.81345	0.414889
	241.035	52.755	41.118	4.41261	0.391242
	241.379	52.425	41.884	4.36802	0.40218
	241.722	52.732	42.236	4.40951	0.407207
	242.066	54.565	47.901	4.65723	0.488103
	242.41	53.847	50.782	4.56019	0.529243
	242.754	53.689	47.821	4.53884	0.48696
	243.098	52.337	45.502	4.35612	0.453845
	243.442	50.099	45.059	4.05367	0.447519
	243.785	50.701	41.745	4.13503	0.400195
	244.129	53.42	41.626	4.50248	0.398496
	244.473	50.768	42.617	4.14408	0.412647
	244.817	52.004	45.685	4.31112	0.456458
	245.161	55.975	45.996	4.84778	0.460899
	245.505	56.721	45.192	4.9486	0.449418
	245.849	55.322	46.399	4.75953	0.466654
	246.192	57.324	45.267	5.03009	0.450489
	246.536	61.427	44.544	5.58459	0.440165
	246.88	65.381	46.097	6.11895	0.462342
	247.224	60.14	43.541	5.41066	0.425842
	247.568	55.583	42.785	4.7948	0.415046
	247.912	52.539	43.615	4.38342	0.426899
	248.255	52.484	42.956	4.37599	0.417488
	248.599	54.071	45.992	4.59046	0.460842
	248.943	53.373	47.831	4.49613	0.487103
	249.287	52.551	52.455	4.38504	0.553133
	249.631	54.355	58.902	4.62885	0.645196
	249.975	53.375	56.739	4.4964	0.614309
	250.318	53.864	55.163	4.56249	0.591804
	250.662	53.55	53.444	4.52005	0.567256
	251.006	52.574	52.933	4.38815	0.559959
	251.35	50.739	53.856	4.14016	0.57314
	251.694	52.101	49.52	4.32423	0.511222
	252.038	51.539	45.212	4.24828	0.449704
	252.382	53.58	42.463	4.52411	0.410448
	252.725	52.671	41.211	4.40126	0.39257
	253.069	55.575	43.688	4.79372	0.427941
	253.413	55.092	44.241	4.72845	0.435838
	253.757	54.461	41.722	4.64317	0.399867
	254.101	55.123	41.316	4.73264	0.394069
	254.445	55.829	40.788	4.82805	0.386529
	254.788	57.393	42.636	5.03941	0.412919
	255.132	57.493	46.16	5.05293	0.463241
	255.476	58.87	51.265	5.23902	0.53614
	255.82	56.641	53.394	4.93779	0.566542
	256.164	55.921	48.08	4.84048	0.490659
	256.508	58.194	41.907	5.14767	0.402509
	256.852	57.865	39.281	5.1032	0.36501
	257.195	53.826	37.805	4.55735	0.343932
	257.539	53.977	39.088	4.57776	0.362253
	257.883	57.366	39.825	5.03577	0.372778
	258.227	59.002	37.221	5.25686	0.335593
	258.571	59.034	39.147	5.26119	0.363096
	258.915	57.383	38.995	5.03806	0.360925
	259.258	58.526	38.34	5.19253	0.351572
	259.602	58.859	39.397	5.23754	0.366666
	259.946	57.876	39.835	5.10469	0.372921
	260.29	63.258	38.512	5.83204	0.354028
	260.634	68.644	36.959	6.55993	0.331852
	260.978	71.809	40.7	6.98766	0.385273
	261.321	77.863	39.831	7.80583	0.372863
	261.665	84.269	39.331	8.67157	0.365724
	262.009	88.907	41.601	9.29837	0.398139
	262.353	90.934	39.949	9.57231	0.374549
	262.697	88.746	40.105	9.27661	0.376776
	263.041	88.657	41.026	9.26458	0.389928
	263.385	85.982	41.685	8.90307	0.399338
	263.728	84.014	39.471	8.63711	0.367723
	264.072	79.215	37.848	7.98855	0.344546
	264.416	72.17	38.111	7.03645	0.348302
	264.76	69.028	38.68	6.61182	0.356427
	265.104	66.404	39.307	6.2572	0.365381
	265.448	66.002	40.267	6.20288	0.37909
	265.791	64.835	37.416	6.04516	0.338377
	266.135	61.098	37.541	5.54013	0.340162
	266.479	57.447	36.336	5.04671	0.322955
	266.823	59.576	34.011	5.33444	0.289754
	267.167	60.809	36.216	5.50107	0.321242
	267.511	60.799	39.837	5.49972	0.372949
	267.855	61.715	39.61	5.62351	0.369708
	268.198	58.989	41.973	5.25511	0.403451
	268.542	56.08	43.271	4.86197	0.421986
	268.886	55.23	40.965	4.7471	0.389057
	269.23	53.576	37.099	4.52357	0.333851
	269.574	54.127	37.475	4.59803	0.33922
	269.918	54.97	36.239	4.71196	0.32157
	270.261	57.254	36.207	5.02063	0.321113
	270.605	54.805	37.559	4.68966	0.340419
	270.949	54.203	36.333	4.6083	0.322912
	271.293	52.682	33.937	4.40275	0.288698
	271.637	52.903	36.132	4.43261	0.320042
	271.981	51.947	35.389	4.30342	0.309432
	272.325	53.874	35.421	4.56384	0.309889
	272.668	52.973	34.614	4.44207	0.298365
	273.012	52.152	33.951	4.33112	0.288897
	273.356	51.237	33.017	4.20746	0.27556
	273.7	51.835	33.228	4.28828	0.278573
	274.044	52.767	34.111	4.41424	0.291182
	274.388	51.451	32.285	4.23638	0.265107
	274.731	51.071	32.973	4.18503	0.274932
	275.075	50.437	30.965	4.09935	0.246258
	275.419	50.763	30.618	4.1434	0.241302
	275.763	51.853	32.44	4.29071	0.26732
	276.107	52.011	32.139	4.31207	0.263022
	276.451	51.457	30.706	4.2372	0.242559
	276.794	51.557	32.236	4.25071	0.264407
	277.138	52.44	30.263	4.37004	0.236233
	277.482	53.159	32.474	4.46721	0.267806
	277.826	54.302	32.479	4.62168	0.267877
	278.17	56.143	31.319	4.87048	0.251313
	278.514	56.634	32.75	4.93684	0.271747
	278.858	53.473	31.456	4.50965	0.253269
	279.201	53.386	32.242	4.49789	0.264493
	279.545	53.526	32.612	4.51681	0.269777
	279.889	50.818	32.753	4.15084	0.27179
	280.233	49.925	30.872	4.03015	0.24493
	280.577	49.343	31.255	3.9515	0.250399
	280.921	49.825	30.332	4.01664	0.237218
	281.264	50.756	28.814	4.14246	0.215541
	281.608	48.153	28.698	3.79068	0.213885
	281.952	50.247	29.206	4.07367	0.221139
	282.296	51.901	29.542	4.2972	0.225937
	282.64	50.922	28.755	4.16489	0.214699
	282.984	52.007	29.023	4.31153	0.218526
	283.328	51.885	28.968	4.29504	0.217741
	283.671	52.685	26.917	4.40315	0.188452
	284.015	50.99	29.094	4.17408	0.21954
	284.359	53.378	27.779	4.49681	0.200762
	284.703	53.954	30.008	4.57465	0.232592
	285.047	54.031	29.057	4.58506	0.219011
	285.391	55.721	29.556	4.81345	0.226137
	285.734	55.572	29.097	4.79332	0.219583
	286.078	51.983	27.798	4.30828	0.201033
	286.422	51.693	26.327	4.26909	0.180027
	286.766	52.685	27.48	4.40315	0.196492
	287.11	53.953	26.779	4.57452	0.186482
	287.454	53.923	25.321	4.57046	0.165662
	287.797	54.356	26.314	4.62898	0.179842
	288.141	53.51	28.473	4.51465	0.210672
	288.485	52.348	27.138	4.35761	0.191608
	288.829	52.27	27.04	4.34707	0.190209
	289.173	52.084	26.822	4.32193	0.187096
	289.517	52.517	25.385	4.38045	0.166575
	289.861	50.942	27.717	4.1676	0.199876
	290.204	49.215	26.988	3.9342	0.189466
	290.548	49.483	26.834	3.97042	0.187267
	290.892	46.871	25.617	3.61742	0.169888
	291.236	48.855	25.468	3.88555	0.167761
	291.58	48.086	26.933	3.78162	0.188681
	291.924	47.526	27.115	3.70594	0.19128
	292.267	47.348	25.134	3.68189	0.162991
	292.611	47.554	26.359	3.70973	0.180484
	292.955	48.238	25.739	3.80216	0.171631
	293.299	48.292	26.493	3.80946	0.182398
	293.643	48.054	25.116	3.7773	0.162734
	293.987	49.034	25.333	3.90974	0.165833
	294.331	45.464	24.329	3.42727	0.151496
	294.674	45.281	24.196	3.40254	0.149597
	295.018	43.646	22.647	3.18158	0.127477
	295.362	46.422	22.94	3.55674	0.131661
	295.706	49.86	23.087	4.02137	0.13376
	296.05	48.433	24.376	3.82852	0.152167
	296.394	49.97	24.797	4.03624	0.158179
	296.737	50.812	24.561	4.15003	0.154809
	297.081	48.33	23.872	3.8146	0.14497
	297.425	47.392	22.834	3.68783	0.130147
	297.769	46.142	22.007	3.5189	0.118338
	298.113	46.218	21.332	3.52917	0.108699
	298.457	43.374	21.856	3.14482	0.116182
	298.8	43.262	23.035	3.12968	0.133018
	299.144	43.017	20.397	3.09657	0.0953472
	299.488	44.325	20.931	3.27334	0.102973
	299.832	43.455	21.673	3.15577	0.113568
	300.176	43.811	20.924	3.20388	0.102873
	300.52	43.164	19.357	3.11644	0.080496
	300.864	43.049	21.288	3.1009	0.108071
	301.207	42.085	23.474	2.97062	0.139287
	301.551	43.146	22.879	3.11401	0.13079
	301.895	42.759	21.484	3.06171	0.110869
	302.239	42.237	21.391	2.99116	0.109541
	302.583	42.904	22.313	3.0813	0.122708
	302.927	41.648	22.502	2.91156	0.125406
	303.27	39.522	21.648	2.62424	0.113211
	303.614	40.677	20.324	2.78033	0.0943047
	303.958	44.474	20.651	3.29348	0.0989743
	304.302	43.119	19.123	3.11036	0.0771545
	304.646	41.289	19.865	2.86304	0.0877502
	304.99	41.865	19.37	2.94089	0.0806817
	305.334	42.328	16.648	3.00346	0.0418117
	305.677	41.392	17.267	2.87696	0.0506509
	306.021	40.035	18.182	2.69357	0.0637171
	306.365	41.624	18.988	2.90832	0.0752267
	306.709	41.48	18.171	2.88886	0.06356
	307.053	40.106	17.985	2.70317	0.0609039
	307.397	41.302	16.8	2.8648	0.0439822
	307.74	41.867	16.278	2.94116	0.0365281
	308.084	42.215	16.392	2.98819	0.038156
	308.428	41.101	14.898	2.83764	0.0168218
	308.772	40.377	14.777	2.73979	0.0150939
	309.116	41.913	14.788	2.94737	0.015251
	309.46	42.399	13.72	3.01305	0
	309.804	40.66	14.25	2.77804	0.00756837
	310.147	40.549	14.285	2.76304	0.00806817
	310.491	39.798		2.66154
	310.835	39.831		2.666
	311.179	39.001		2.55383
	311.523	39.541		2.62681
	311.867	41.269		2.86034
	312.21	40.908		2.81155
	312.554	42.177		2.98305
	312.898	41.044		2.82993
	313.242	41.808		2.93318
	313.586	41.479		2.88872
	313.93	41.491		2.89034
	314.273	37.761		2.38625
	314.617	38.302		2.45937
	314.961	37.432		2.34179
	315.305	38.851		2.53356
	315.649	40.663		2.77844
	315.993	39.803		2.66222
	316.337	39.454		2.61505
	316.68	40.83		2.80101
	317.024	40.688		2.78182
	317.368	38.58		2.49694
