# Supplementary material for: Direct visualization of a native Wnt in vivo reveals that a long-range Wnt gradient forms by extracellular dispersal
Source: eLife journal article supplement (doi:10.7554/elife.38325), 2018-08-14
Supplement: supp [file elife-38325-supp-v1.zip › elife_poa_e38325_Figure_6_source_data_2.xlsx]

## Sheet: Sheet1
	Figure 6 - source data 2. Mean non-muscle EGL-20::YPET fluorescence intensity in control and Morphotrap animals
	EGL-20::YPET	EGL-20::YPET + Morphotrap
	145	59
	183	49
	185	68
	204	77
	152	57
	230	71
	143	64
	173	71
	150	61
	166	108
	169	128
	164	113
	193	74
	192	68
	191	91
